# Supplementary material
Source: publisher figshare collection journal article supplement (https://acs.figshare.com/ndownloader/files/3880324)
Supplement: Supplementary file 1 [file 3880324]

# **Sc(OTf)<sub>3</sub>-Catalyzed Transfer Diazenylation of 1,3-Dicarbonyls with Triazenes *via* N-N Bond Cleavage**

Cong Liu, Jian Lv, Sanzhong Luo\* and Jin-Pei Cheng

\*Beijing National Laboratory for Molecular Sciences (BNLMS), CAS Key Laboratory for Molecular Recognition and Function, Institute of Chemistry, the Chinese Academy of Sciences, Beijing, 100190, China; Collaborative Innovation Center of Chemical Science and Engineering (Tianjin), Tianjin, 300071, China

The State Key Laboratory of Elemento-Organic Chemistry, Department of Chemistry, Nankai University, Tianjin, 300071, China

Email: [luosz@iccas.ac.cn](mailto:luosz@iccas.ac.cn)

# Supporting Information

## Table of Contents

|                                           |     |
|-------------------------------------------|-----|
| 1. General Information and Materials..... | S1  |
| 2. Experimental Section.....              | S2  |
| 4. Characterization.....                  | S3  |
| 5. References.....                        | S8  |
| 6. NMR spectrum .....                     | S9  |
| 7. HPLC spectrum.....                     | S37 |

**General Information:** Commercial reagents were used as received, unless otherwise stated.  $^1\text{H}$  and  $^{13}\text{C}$  NMR were recorded on Bruker UltraShield 300 MHz spectrometer spectrometer, and  $^{19}\text{F}$  and  $^{31}\text{P}$  NMR were recorded on Bruker Avance 500 MHz spectrometer spectrometer.  $^1\text{H}$  NMR and  $^{13}\text{C}$  NMR chemical shifts were determined relative to internal standard TMS at  $\delta$  0.0 and  $^{19}\text{F}$  NMR and  $^{31}\text{P}$  NMR chemical shifts were determined relative to  $\text{CFCl}_3$  and 85%  $\text{H}_3\text{PO}_4$  aqueous solution as internal standard. Chemical shifts ( $\delta$ ) are reported in ppm, and coupling constants (J) are in Hertz (Hz). The following abbreviations were used to designate chemical shift multiplicities: s= singlet, d= doublet, t= triplet, q= quartet, m= multiplet. All first-order splitting patterns were assigned on the basis of the appearance of the multiplet. Splitting patterns that could not be easily interpreted are designated as multiplet (m). Infrared Spectroscopy was conducted on Thermo Fisher Nicolet 6700. High resolution mass spectra were obtained using electrospray ionization (ESI) mass spectrometer. HPLC analysis was performed using Chiralcel columns purchased.

**Materials:**  $\beta$ -Keto esters **1a-1g**, **1i**, malonic ester **1o** and ethyl cyanacetate **1p** were prepared by alkylation of the corresponding  $\alpha$ -unsubstituted  $\beta$ -keto esters with alkyl iodide or bromide.<sup>[1]</sup> 1,3-diketones **3m** and **3n** were prepared using standard literature procedures.<sup>[2]</sup>  $\beta$ -Keto esters **3j-3l** and  $\beta$ -keto amide **1q** were prepared according to standard literature procedures.<sup>[3]</sup>  $\beta$ -keto phosphonate **1r**<sup>[4]</sup> and  $\alpha$ -(Phenylsulfonyl)acetophenone **1s**<sup>[5]</sup> were prepared using standard literature procedures. All triazenes were prepared according to standard literature procedures.<sup>[6]</sup> All other reagents were received from commercial sources without further purification. Solvents were freshly dried according to *the purification handbook Purification of Laboratory Chemicals* before using.

## Experimental Section

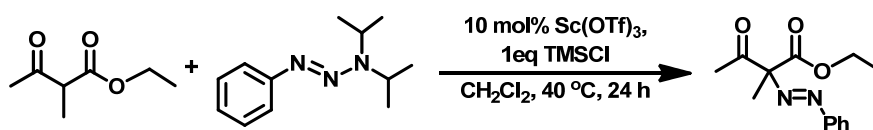

2-methyl acetoacetate **1a** (0.12 mmol, 17.3 mg), 3,3-diisopropyl-1-phenyltriazene **2a** (0.10 mmol, 20.5 mg), and  $\text{Sc}(\text{OTf})_3$  (0.01 mmol, 4.9 mg) were added to a 10 mL flame-dried Schlenk tube under argon, followed by addition of anhydrous  $\text{CH}_2\text{Cl}_2$  (0.3 mL). After TMSCl (0.1 mmol, 13  $\mu\text{L}$ ) in  $\text{CH}_2\text{Cl}_2$  (0.1 mL) was added, the resulting mixture was stirred at 40  $^\circ\text{C}$  for 24 h. After monitored by TLC, the crude product was purified by flash column chromatography on silica gel to afford the desired product (21.1 mg, 85% yield) as light yellow oil.

## Characterization of new compounds

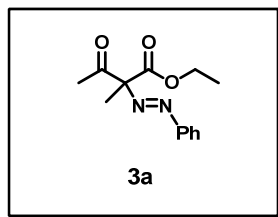

The azo product was synthesized according to the general procedure as yellow oil in 85% overall yield (21.1 mg).  $^1\text{H}$  NMR (300 MHz,  $\text{CDCl}_3$ )  $\delta$  7.79–7.72 (m, 2H), 7.50–7.48 (m, 3H), 4.27 (qd,  $J = 7.2, 4.7$  Hz, 2H), 2.36 (s, 3H), 1.66 (s, 3H), 1.28 (t,  $J = 7.1$  Hz, 3H);  $^{13}\text{C}$  NMR (75 MHz,  $\text{CDCl}_3$ )  $\delta$  203.4, 169.2, 151.7, 131.8, 129.2, 122.8, 88.0, 62.0, 28.3, 19.0, 14.2. IR (thin film,  $\text{cm}^{-1}$ ): 2984, 2940, 1724, 1453, 1368, 1258, 1139, 1020. HRMS ( $\text{ESI}^+$ ): calcd. for  $[\text{C}_{13}\text{H}_{16}\text{N}_2\text{O}_3+\text{Na}]^+$  271.1053, found 271.1047. For chiral product: 24% *ee*: the enantiomeric excess was determined by HPLC with an OJ-H column at 254 nm (2-propanol: hexane=3:97), 1.0 mL/min;  $t_{\text{R}}$  = 18.5 min (major), 22.4 min (minor).

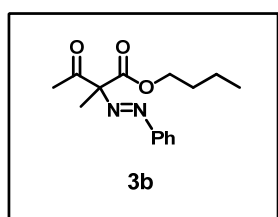

The azo product was synthesized according to the general procedure as yellow oil in 80% overall yield (22.1 mg).  $^1\text{H}$  NMR (300 MHz,  $\text{CDCl}_3$ )  $\delta$  7.78–7.72 (m, 2H), 7.50–7.48 (m, 3H), 4.22 (td,  $J = 6.6, 3.5$  Hz, 2H), 2.35 (s, 3H), 1.66 (s, 3H), 1.65–1.58 (m, 2H), 1.38–1.28 (m, 2H), 0.90 (t,  $J = 7.4$  Hz, 3H);  $^{13}\text{C}$  NMR (75 MHz,  $\text{CDCl}_3$ )  $\delta$  203.3, 169.2, 151.6, 131.8, 129.2, 122.7, 88.1, 65.7, 30.6, 28.3, 19.1, 19.0, 13.7. IR (thin film,  $\text{cm}^{-1}$ ): 2961, 2936, 2874, 1748, 1724, 1454, 1355, 1260, 1119. HRMS ( $\text{ESI}^+$ ): calcd. for  $[\text{C}_{15}\text{H}_{20}\text{N}_2\text{O}_3+\text{Na}]^+$  299.1366, found 299.1366.

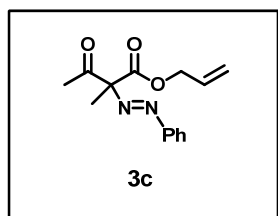

The azo product was synthesized according to the general procedure as yellow oil in 86% overall yield (22.4 mg).  $^1\text{H}$  NMR (300 MHz,  $\text{CDCl}_3$ )  $\delta$  7.78–7.73 (m, 2H), 7.51–7.47 (m, 3H), 5.90 (ddt,  $J = 16.0, 11.4, 5.7$  Hz, 1H), 5.35–5.22 (m, 2H), 4.71 (d,  $J = 5.8$  Hz, 2H), 2.36 (s, 3H), 1.68 (s, 3H);  $^{13}\text{C}$  NMR (75 MHz,  $\text{CDCl}_3$ )  $\delta$  203.2, 168.9, 151.6, 131.9, 131.5, 129.2, 122.8, 118.9, 88.1, 66.3, 28.3, 19.1. IR (thin film,  $\text{cm}^{-1}$ ): 3067, 2993, 2940, 1748, 1724, 1453, 1356, 1254, 1120, 928. HRMS ( $\text{ESI}^+$ ): calcd. for  $[\text{C}_{14}\text{H}_{16}\text{N}_2\text{O}_3+\text{Na}]^+$  283.1053, found 283.1055.

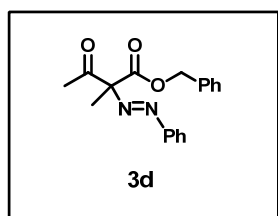

The azo product was synthesized according to the general procedure as yellow oil in 90% overall yield (27.9 mg).  $^1\text{H}$  NMR (300 MHz,  $\text{CDCl}_3$ )  $\delta$  7.64–7.61 (m, 2H), 7.43–7.38 (m, 3H), 7.25 (s, 4H), 7.19 (s, 1H), 5.18 (q,  $J = 12.4$  Hz, 2H), 2.25 (s, 3H), 1.61 (s, 3H);  $^{13}\text{C}$  NMR (75 MHz,  $\text{CDCl}_3$ )  $\delta$  203.3, 169.1, 151.6, 135.4, 131.9, 129.2, 128.7, 128.5, 128.3, 122.8, 88.1, 67.5, 28.4, 19.1. IR (thin film,  $\text{cm}^{-1}$ ): 3445, 1722, 1635, 1454, 1260, 1115. HRMS ( $\text{ESI}^+$ ): calcd. for  $[\text{C}_{18}\text{H}_{18}\text{N}_2\text{O}_3+\text{Na}]^+$  333.1210, found 333.1208.

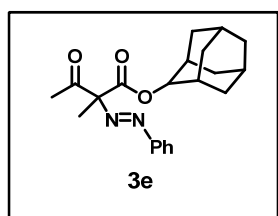

The azo product was synthesized according to the general procedure as yellow oil in 75% overall yield (26.6 mg).  $^1\text{H}$  NMR (300 MHz,  $\text{CDCl}_3$ )  $\delta$

7.76–7.73 (m, 2H), 7.51–7.46 (m, 3H), 2.33 (s, 3H), 2.17 (s, 3H), 2.13 (s, 6H), 1.65 (s, 6H), 1.60 (s, 3H);  $^{13}\text{C}$  NMR (75 MHz,  $\text{CDCl}_3$ )  $\delta$  203.4, 167.7, 151.8, 131.6, 129.2, 122.6, 88.4, 83.0, 41.3, 36.2, 31.0, 28.3, 18.8. IR (thin film,  $\text{cm}^{-1}$ ): 3447, 2912, 2853, 1744, 1721, 1455, 1354, 1258, 1143, 1052, 966. HRMS ( $\text{ESI}^+$ ): calcd. for  $[\text{C}_{21}\text{H}_{26}\text{N}_2\text{O}_3+\text{Na}]^+$  377.1836, found 377.1834.

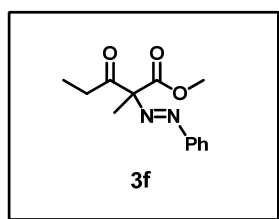

The azo product was synthesized according to the general procedure as yellow oil in 97% overall yield (24.1 mg).  $^1\text{H}$  NMR (300 MHz,  $\text{CDCl}_3$ )  $\delta$  7.78–7.72 (m, 2H), 7.50–7.48 (m, 3H), 3.78 (s, 3H), 2.69 (q,  $J = 7.1$  Hz, 2H), 1.68 (s, 3H), 1.12 (t,  $J = 7.16$  Hz, 3H);  $^{13}\text{C}$  NMR (75 MHz,  $\text{CDCl}_3$ )  $\delta$  206.2, 169.9, 151.7, 131.8, 129.2, 122.8, 88.1, 52.8, 34.3, 19.3, 7.8. IR (thin film,  $\text{cm}^{-1}$ ): 3445, 1755, 1724, 1646, 1453, 1266, 1124. HRMS ( $\text{ESI}^+$ ): calcd. for  $[\text{C}_{13}\text{H}_{16}\text{N}_2\text{O}_3+\text{Na}]^+$  271.1053, found 271.1055.

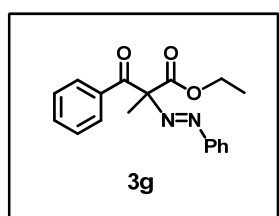

The azo product was synthesized according to the general procedure as yellow oil in 91% overall yield (28.2 mg).  $^1\text{H}$  NMR (300 MHz,  $\text{CDCl}_3$ )  $\delta$  7.86–7.83 (m, 2H), 7.72–7.68 (m, 2H), 7.50–7.36 (m, 6H), 4.25 (qd,  $J = 7.1, 4.5$  Hz, 2H), 1.82 (s, 3H), 1.11 (t,  $J = 7.1$  Hz, 3H);  $^{13}\text{C}$  NMR (75 MHz,  $\text{CDCl}_3$ )  $\delta$  193.2, 171.0, 151.9, 134.7, 133.0, 131.7, 129.9, 129.1, 128.6, 122.8, 85.4, 62.0, 21.1, 14.0. IR (thin film,  $\text{cm}^{-1}$ ): 3369, 3064, 2980, 2938, 1748, 1694, 1600, 1449, 1369, 1263, 1118. HRMS ( $\text{ESI}^+$ ): calcd. for  $[\text{C}_{18}\text{H}_{18}\text{N}_2\text{O}_3+\text{Na}]^+$  333.1210, found 333.1207.

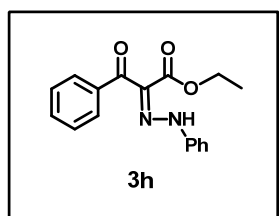

The azo product was synthesized according to the general procedure as yellow oil in 95% overall yield (28.2 mg, keto : enol  $\approx$  7:1). NMR data for major keto isomer:  $^1\text{H}$  NMR (300 MHz,  $\text{CDCl}_3$ )  $\delta$  12.74 (s, 1H), 7.93 (d,  $J = 7.5$  Hz, 2H), 7.56 (d,  $J = 7.4$  Hz, 1H), 7.46 (t,  $J = 7.8$  Hz, 2H), 7.29 (q,  $J = 7.6$  Hz, 2H), 7.17 (d,  $J = 8.0$  Hz, 2H), 7.08 (t,  $J = 7.4$  Hz, 1H), 4.37 (q,  $J = 7.2$  Hz, 2H), 1.36 (t,  $J = 7.2$  Hz, 3H);  $^{13}\text{C}$  NMR (75 MHz,  $\text{CDCl}_3$ )  $\delta$  189.7, 164.2, 142.0, 138.0, 132.5, 130.5, 129.7, 128.1, 124.6, 115.5, 61.5, 14.2. IR (thin film,  $\text{cm}^{-1}$ ): 3446, 1660, 1601, 1526, 1472, 1304, 1225, 1189, 903. HRMS ( $\text{ESI}^+$ ): calcd. for  $[\text{C}_{17}\text{H}_{16}\text{N}_2\text{O}_3+\text{Na}]^+$  319.1053, found 319.1055.

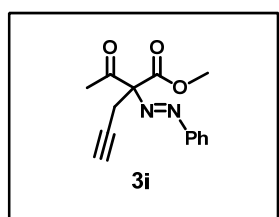

The azo product was synthesized according to the general procedure as yellow oil in 88% overall yield (22.7 mg).  $^1\text{H}$  NMR (300 MHz,  $\text{CDCl}_3$ )  $\delta$  7.82–7.78 (m, 2H), 7.53–7.50 (m, 3H), 3.81 (s, 3H), 3.17–3.02 (m, 2H), 2.44 (s, 3H), 1.99 (s, 1H);  $^{13}\text{C}$  NMR (75 MHz,  $\text{CDCl}_3$ )  $\delta$  201.9, 168.0, 151.6, 132.2, 129.5, 129.3, 123.1, 114.5, 89.0, 78.3, 71.5, 53.1, 29.4, 23.8. IR (thin film,  $\text{cm}^{-1}$ ): 3446, 3293, 1722, 1646, 1435, 1355, 1239, 1207. HRMS ( $\text{ESI}^+$ ): calcd. for  $[\text{C}_{14}\text{H}_{14}\text{N}_2\text{O}_3+\text{Na}]^+$  281.0897, found 281.0895.

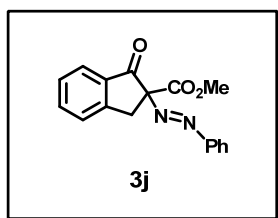

The azo product was synthesized according to the general procedure as yellow oil in 79% overall yield (21.5 mg).  $^1\text{H}$  NMR (300 MHz,  $\text{CDCl}_3$ )  $\delta$  7.82 (d,  $J = 7.8$  Hz, 1H), 7.77–7.71 (m, 2H), 7.66 (t,  $J = 7.4$  Hz, 1H), 7.53 (d,  $J = 7.8$  Hz, 1H), 7.46–7.42 (m, 4H), 3.98–3.84 (m, 5H);  $^{13}\text{C}$  NMR (75 MHz,  $\text{CDCl}_3$ )  $\delta$  196.6, 169.0, 152.3, 151.5, 136.0, 134.5, 131.7, 129.1, 128.3, 126.6, 125.3, 123.0, 87.8, 53.3, 36.0. IR (thin film,  $\text{cm}^{-1}$ ): 3446, 1748, 1716, 1646, 1607, 1434, 1272, 1212, 1154, 960. HRMS ( $\text{ESI}^+$ ): calcd. for  $[\text{C}_{17}\text{H}_{14}\text{N}_2\text{O}_3+\text{Na}]^+$  317.0897, found 317.0893.

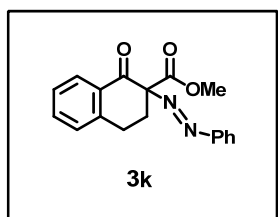

The azo product was synthesized according to the general procedure as yellow oil in 71% overall yield (21.9 mg).  $^1\text{H}$  NMR (300 MHz,  $\text{CDCl}_3$ )  $\delta$  8.10 (d,  $J = 7.7$  Hz, 1H), 7.71–7.68 (m, 2H), 7.50 (t,  $J = 7.4$  Hz, 1H), 7.45–7.42 (m, 3H), 7.34 (t,  $J = 7.5$  Hz, 1H), 7.23 (d,  $J = 7.6$  Hz, 1H), 3.80 (s, 3H), 3.13–3.07 (m, 2H), 2.98–2.92 (m, 2H);  $^{13}\text{C}$  NMR (75 MHz,  $\text{CDCl}_3$ )  $\delta$  191.6, 168.7, 151.5, 142.9, 134.0, 131.6, 129.0, 128.9, 128.1, 127.2, 122.9, 85.2, 53.0, 31.1, 25.1. IR (thin film,  $\text{cm}^{-1}$ ): 3446, 1743, 1688, 1646, 1602, 1455, 1301, 1263, 1225, 905. HRMS ( $\text{ESI}^+$ ): calcd. for  $[\text{C}_{18}\text{H}_{16}\text{N}_2\text{O}_3+\text{Na}]^+$  331.1053, found 331.1056.

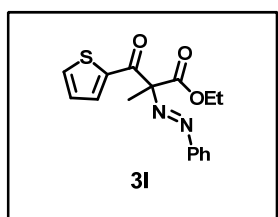

The azo product was synthesized according to the general procedure as yellow oil in 75% overall yield (23.7 mg).  $^1\text{H}$  NMR (300 MHz,  $\text{CDCl}_3$ )  $\delta$  7.79–7.74 (m, 3H), 7.63 (d,  $J = 4.92$  Hz, 1H), 7.48–7.46 (m, 3H), 7.10–7.07 (m, 1H), 4.35–4.18 (m, 2H), 1.81 (s, 3H), 1.18 (t,  $J = 7.1$  Hz, 3H);  $^{13}\text{C}$  NMR (75 MHz,  $\text{CDCl}_3$ )  $\delta$  186.7, 170.1, 151.8, 141.6, 134.7, 134.5, 131.8, 129.2, 128.1, 123.0, 86.6, 62.1, 20.4, 14.1. IR (thin film,  $\text{cm}^{-1}$ ): 3100, 2985, 2938, 1748, 1670, 1515, 1445, 1411, 1355, 1266, 1116, 1018, 851. HRMS ( $\text{ESI}^+$ ): calcd. for  $[\text{C}_{16}\text{H}_{16}\text{N}_2\text{O}_3\text{S}+\text{Na}]^+$  339.0774, found 339.0773.

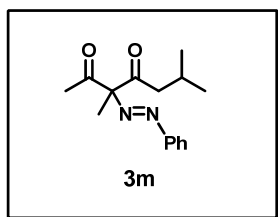

The azo product was synthesized according to the general procedure as yellow oil in 94% overall yield (24.5 mg).  $^1\text{H}$  NMR (300 MHz,  $\text{CDCl}_3$ )  $\delta$  7.80–7.75 (m, 2H), 7.53–7.50 (m, 3H), 2.58–2.41 (m, 2H), 2.28–2.19 (m, 4H), 1.56 (s, 3H), 0.91 (dd,  $J = 11.8, 6.7$  Hz, 6H);  $^{13}\text{C}$  NMR (75 MHz,  $\text{CDCl}_3$ )  $\delta$  205.8, 204.0, 151.9, 131.9, 129.4, 122.7, 93.8, 49.6, 28.5, 24.0, 22.7, 22.6, 18.4. IR (thin film,  $\text{cm}^{-1}$ ): 3361, 2958, 2922, 1732, 1712, 1469, 1454, 1355, 1036. HRMS ( $\text{ESI}^+$ ): calcd. for  $[\text{C}_{15}\text{H}_{20}\text{N}_2\text{O}_2+\text{Na}]^+$  283.1417, found 283.1417.

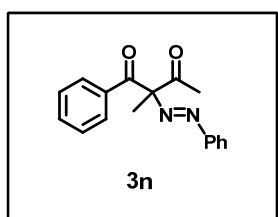

The azo product was synthesized according to the general procedure as yellow oil in 91% overall yield (25.5 mg).  $^1\text{H}$  NMR (300 MHz,  $\text{CDCl}_3$ )  $\delta$  7.74–7.67 (m, 4H), 7.49–7.43 (m, 4H), 7.38 (t,  $J = 7.4$  Hz, 2H), 2.56 (s, 3H), 1.75 (s, 3H);  $^{13}\text{C}$  NMR (75 MHz,  $\text{CDCl}_3$ )  $\delta$  205.9, 195.4, 151.9,

134.4, 133.0, 131.9, 130.0, 129.2, 128.7, 122.6, 91.9, 27.6, 20.9. IR (thin film,  $\text{cm}^{-1}$ ): 3446, 1716, 1693, 1597, 1449, 1358, 1241, 1102. HRMS ( $\text{ESI}^+$ ): calcd. for  $[\text{C}_{17}\text{H}_{16}\text{N}_2\text{O}_2+\text{Na}]^+$  303.1104, found 303.1103.

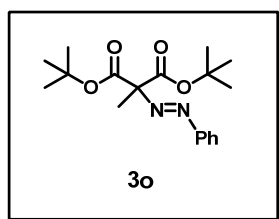

The azo product was synthesized according to the general procedure as yellow oil in 70% overall yield (23.4 mg).  $^1\text{H}$  NMR (300 MHz,  $\text{CDCl}_3$ )  $\delta$  7.76–7.70 (m, 2H), 7.46–7.44 (m, 3H), 1.70 (s, 3H), 1.50 (s, 18H);  $^{13}\text{C}$  NMR (75 MHz,  $\text{CDCl}_3$ )  $\delta$  168.0, 151.7, 131.4, 129.1, 122.7, 83.1, 82.4, 28.1, 20.2. IR (thin film,  $\text{cm}^{-1}$ ): 3470, 2979, 2936, 1739, 1478, 1455, 1393, 1369, 1286, 1255, 1127, 845, 751. HRMS ( $\text{ESI}^+$ ): calcd. for  $[\text{C}_{18}\text{H}_{26}\text{N}_2\text{O}_4+\text{Na}]^+$  357.1785, found 357.1784.

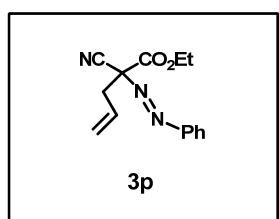

The azo product was synthesized according to the general procedure as yellow oil in 83% overall yield (21.4 mg).  $^1\text{H}$  NMR (300 MHz,  $\text{CDCl}_3$ )  $\delta$  7.82–7.79 (m, 2H), 7.54–7.47 (m, 3H), 5.83 (ddt,  $J = 17.3, 10.1, 7.2$  Hz, 1H), 5.37–5.28 (m, 2H), 4.36 (q,  $J = 7.1$  Hz, 2H), 3.22 (dd,  $J = 14.0, 7.2$  Hz, 1H), 3.08 (dd,  $J = 13.9, 7.3$  Hz, 1H), 1.34 (t,  $J = 7.1$  Hz, 3H);  $^{13}\text{C}$  NMR (75 MHz,  $\text{CDCl}_3$ )  $\delta$  164.3, 150.7, 132.7, 129.4, 129.1, 123.5, 122.2, 114.9, 79.4, 63.7, 40.3, 14.2. IR (thin film,  $\text{cm}^{-1}$ ): 3480, 3089, 1748, 1644, 1455, 1227, 1150, 1096, 992, 929. HRMS ( $\text{ESI}^+$ ): calcd. for  $[\text{C}_{14}\text{H}_{15}\text{N}_3\text{O}_2+\text{Na}]^+$  280.1056, found 280.1059.

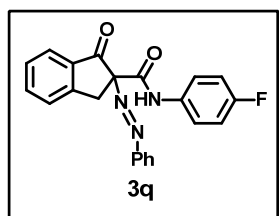

The azo product was synthesized according to the general procedure as yellow solid in 76% overall yield (28.3 mg).  $^1\text{H}$  NMR (300 MHz,  $\text{CDCl}_3$ )  $\delta$  9.41 (s, 1H), 7.78–7.58 (m, 7H), 7.48–7.38 (m, 4H), 7.05 (t,  $J = 8.4$  Hz, 2H), 4.19 (d,  $J = 17.6$  Hz, 1H), 3.96 (d,  $J = 17.6$  Hz, 1H);  $^{13}\text{C}$  NMR (75 MHz,  $\text{CDCl}_3$ )  $\delta$  198.1, 164.3, 161.4, 158.1, 154.1, 151.2, 136.5, 133.8, 133.7, 133.4, 132.1, 129.3, 128.1, 126.7, 125.5, 123.0, 122.2, 122.1, 115.9, 115.6, 89.8, 33.4;  $^{19}\text{F}$  NMR (471 MHz,  $\text{CDCl}_3$ )  $\delta$  -117.5. IR (thin film,  $\text{cm}^{-1}$ ): 3354, 1716, 1682, 1608, 1589, 1508, 1476, 1408, 1302, 1272, 1212, 1156, 912, 833. HRMS ( $\text{ESI}^+$ ): calcd. for  $[\text{C}_{22}\text{H}_{16}\text{FN}_3\text{O}_2+\text{Na}]^+$  396.1119, found 396.1118.

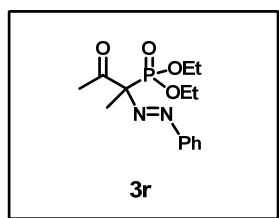

The azo product was synthesized according to the general procedure as yellow oil in 65% overall yield (20.3 mg).  $^1\text{H}$  NMR (300 MHz,  $\text{CDCl}_3$ )  $\delta$  7.81–7.75 (m, 2H), 7.50–7.48 (m, 3H), 4.25–4.12 (m, 4H), 2.47 (s, 3H), 1.67 (d,  $J = 15.1$  Hz, 3H), 1.35–1.26 (m, 6H);  $^{13}\text{C}$  NMR (75 MHz,  $\text{CDCl}_3$ )  $\delta$  203.2, 152.0, 151.9, 131.7, 129.5, 129.3, 122.8, 118.0, 89.5, 87.6, 63.9, 63.8, 63.7, 29.5, 16.6, 16.5, 16.1;  $^{31}\text{P}$  NMR (202 MHz,  $\text{CDCl}_3$ )  $\delta$  17.0. IR (thin film,  $\text{cm}^{-1}$ ): 2985, 2930, 1719, 1444, 1392, 1355, 1257, 1162, 1098, 1047, 1020. HRMS ( $\text{ESI}^+$ ): calcd. for  $[\text{C}_{14}\text{H}_{21}\text{N}_2\text{O}_4\text{P}+\text{Na}]^+$  335.1131, found 335.1128.

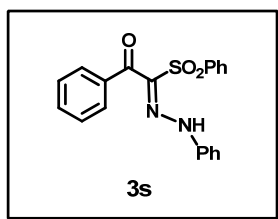

The azo product was synthesized according to the general procedure as yellow solid in 53% overall yield (19.3 mg).  $^1\text{H}$  NMR (300 MHz,  $\text{CDCl}_3$ )  $\delta$  12.44 (s, 1H), 8.18 (d,  $J$  = 7.2Hz, 2H), 7.80 (d,  $J$  = 6.9Hz, 2H), 7.69–7.52 (m, 4H), 7.45–7.34 (m, 4H), 7.20–7.14 (m, 3H);  $^{13}\text{C}$  NMR (75 MHz,  $\text{CDCl}_3$ )  $\delta$  186.6, 141.4, 140.5, 137.2, 134.3, 132.4, 130.3, 129.9, 129.2, 128.7, 128.0, 125.5, 115.7. IR (thin film,  $\text{cm}^{-1}$ ): 3446, 3228, 1647, 1600, 1522, 1479, 1447, 1307, 1281, 1255, 1134, 1069, 878. HRMS ( $\text{ESI}^+$ ): calcd. for  $[\text{C}_{20}\text{H}_{16}\text{N}_2\text{O}_3\text{S}+\text{Na}]^+$  387.0774, found 387.0769.

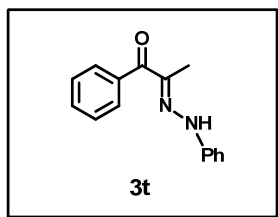

The azo product was synthesized according to the general procedure as yellow solid in 40% overall yield (9.5 mg).  $^1\text{H}$  NMR (300 MHz,  $\text{CDCl}_3$ )  $\delta$  7.95 (d,  $J$  = 7.4Hz, 3H), 7.53 (t,  $J$  = 7.2 Hz, 1H), 7.45 (t,  $J$  = 7.4 Hz, 2H), 7.28 (t,  $J$  = 8.0 Hz, 2H), 7.09 (d,  $J$  = 8.0 Hz, 2H), 6.97 (t,  $J$  = 7.3Hz, 1H), 2.20 (s, 3H);  $^{13}\text{C}$  NMR (75 MHz,  $\text{CDCl}_3$ )  $\delta$  192.0, 143.2, 140.6, 138.1, 131.5, 130.7, 129.6, 127.8, 122.4, 114.3, 9.0. IR (thin film,  $\text{cm}^{-1}$ ): 3446, 1633, 1603, 1555, 1496, 1346, 1242, 1169, 1013, 914. HRMS ( $\text{ESI}^+$ ): calcd. for  $[\text{C}_{15}\text{H}_{14}\text{N}_2\text{O}+\text{H}]^+$  239.1179, found 239.1179.

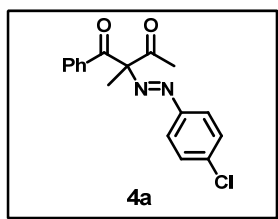

The azo product was synthesized according to the general procedure as yellow solid in 79% overall yield (24.9 mg).  $^1\text{H}$  NMR (300 MHz,  $\text{CDCl}_3$ )  $\delta$  7.66 (dd,  $J$  = 15.8, 8.0Hz, 4H), 7.50–7.35 (m, 5H), 2.53 (s, 3H), 1.74 (s, 3H);  $^{13}\text{C}$  NMR (75 MHz,  $\text{CDCl}_3$ )  $\delta$  205.5, 195.1, 150.2, 138.1, 134.3, 133.2, 130.0, 129.6, 128.7, 123.9, 91.9, 27.6, 20.8. IR (thin film,  $\text{cm}^{-1}$ ): 3446, 1712, 1690, 1594, 1580, 1504, 1448, 1367, 1240, 1087, 1011, 834. HRMS ( $\text{ESI}^+$ ): calcd. for  $[\text{C}_{17}\text{H}_{15}\text{ClN}_2\text{O}_2+\text{Na}]^+$  337.0714, found 337.0713.

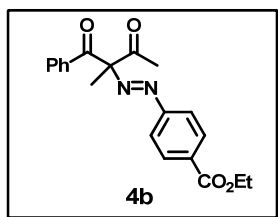

The azo product was synthesized according to the general procedure as yellow oil in 87% overall yield (30.6 mg).  $^1\text{H}$  NMR (300 MHz,  $\text{CDCl}_3$ )  $\delta$  8.12 (d,  $J$  = 8.5Hz, 2H), 7.70 (d,  $J$  = 8.1 Hz, 4H), 7.48 (t,  $J$  = 7.3Hz, 1H), 7.38 (t,  $J$  = 7.5 Hz, 2H), 4.39 (q,  $J$  = 7.2 Hz, 2H), 2.55 (s, 3H), 1.76 (s, 3H), 1.40 (t,  $J$  = 7.1Hz, 3H);  $^{13}\text{C}$  NMR (75 MHz,  $\text{CDCl}_3$ )  $\delta$  205.3, 194.9, 165.8, 154.2, 134.2, 133.2, 133.1, 130.7, 130.0, 128.7, 122.4, 92.4, 61.5, 27.6, 20.8, 14.4. IR (thin film,  $\text{cm}^{-1}$ ): 3446, 1717, 1694, 1597, 1448, 1410, 1366, 1277, 1106, 1015, 864. HRMS ( $\text{ESI}^+$ ): calcd. for  $[\text{C}_{20}\text{H}_{20}\text{N}_2\text{O}_4+\text{Na}]^+$  375.1315, found 375.1312.

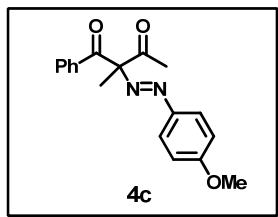

The azo product was synthesized according to the general procedure as yellow solid in 67% overall yield (20.8 mg).  $^1\text{H}$  NMR (300 MHz,  $\text{CDCl}_3$ )  $\delta$  7.70 (d,  $J$  = 7.7Hz, 4H), 7.45 (t,  $J$  = 7.3 Hz, 1H), 7.36 (t,  $J$  = 7.6 Hz, 2H), 6.93 (d,  $J$  = 8.6Hz, 2H), 3.85 (s, 3H), 2.54 (s, 3H), 1.73 (s, 3H);  $^{13}\text{C}$  NMR (75 MHz,  $\text{CDCl}_3$ )  $\delta$  206.4, 195.8, 162.7, 146.3, 134.5, 132.9, 130.1, 128.6,



124.6, 114.3, 91.2, 55.7, 27.6, 20.9. IR (thin film,  $\text{cm}^{-1}$ ): 3446, 1714, 1691, 1602, 1585, 1507, 1448, 1358, 1255, 1149, 1105, 1028, 839. HRMS ( $\text{ESI}^+$ ): calcd. for  $[\text{C}_{18}\text{H}_{18}\text{N}_2\text{O}_3+\text{Na}]^+$  333.1210, found 333.1205.

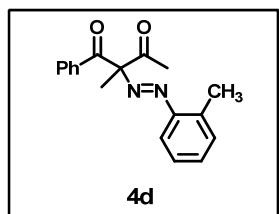

The azo product was synthesized according to the general procedure as yellow oil in 84% overall yield (24.7 mg).  $^1\text{H}$  NMR (300 MHz,  $\text{CDCl}_3$ )  $\delta$  7.68 (d,  $J = 7.2$  Hz, 2H), 7.46 (t,  $J = 7.4$  Hz, 1H), 7.40–7.32 (m, 4H), 7.24–7.19 (m, 2H), 2.61 (s, 3H), 2.25 (s, 3H), 1.75 (s, 3H);  $^{13}\text{C}$  NMR (75 MHz,  $\text{CDCl}_3$ )  $\delta$  206.3, 195.8, 150.2, 138.1, 134.2, 132.9, 131.7, 131.4, 130.1, 128.6, 126.5, 115.1, 92.1, 27.6, 21.3, 17.0. IR (thin film,  $\text{cm}^{-1}$ ): 3446, 1716, 1693, 1598, 1448, 1358, 1241, 1100. HRMS ( $\text{ESI}^+$ ): calcd. for  $[\text{C}_{18}\text{H}_{18}\text{N}_2\text{O}_2+\text{Na}]^+$  317.1260, found 317.1259.

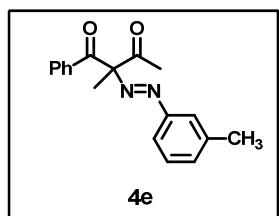

The azo product was synthesized according to the general procedure as yellow oil in 85% overall yield (25.0 mg).  $^1\text{H}$  NMR (300 MHz,  $\text{CDCl}_3$ )  $\delta$  7.70 (d,  $J = 7.76$  Hz, 2H), 7.50–7.44 (m, 3H), 7.40–7.26 (m, 4H), 2.56 (s, 3H), 2.40 (s, 3H), 1.74 (s, 3H);  $^{13}\text{C}$  NMR (75 MHz,  $\text{CDCl}_3$ )  $\delta$  206.1, 195.5, 152.0, 139.3, 134.4, 133.0, 132.6, 130.0, 129.0, 128.7, 123.2, 119.7, 91.7, 27.6, 21.4, 21.0. IR (thin film,  $\text{cm}^{-1}$ ): 3445, 2065, 1645, 1448, 1356, 1238, 1100. HRMS ( $\text{ESI}^+$ ): calcd. for  $[\text{C}_{18}\text{H}_{18}\text{N}_2\text{O}_2+\text{Na}]^+$  317.1260, found 317.1260.

## References:

1. (a) Kalaitzakis, D.; Kambourakis, S.; Rozzell, J. D.; Smonou, I. *Tetrahedron: Asymmetry* **2007**, *18*, 2418; (b) Gao, L.; Kang, B. C.; Hwang, G.-S.; Ryu, D. H. *Angew. Chem. Int. Ed.* **2012**, *51*, 8322.
2. Kalaitzakis, E. D.; Rozzell, D. J.; Kambourakis, S.; Smonou, I. *Adv. Synth. Catal.* **2006**, *348*, 1958.
3. González, D. F.; Brand, J. P.; Mondière, R.; Waser, J. *Adv. Synth. Catal.* **2013**, *355*, 1631.
4. Akula, R.; Galligan, M.; Ibrahim, H. *Chem. Commun.* **2009**, 6991.
5. Suryakiran, N.; Reddy, T. S.; Ashalatha, K.; Lakshman M.; Venkateswarlu, Y. *Tetrahedron Lett.* **2006**, *47*, 3853.
6. (a) Yang, W.; Zhou, J.; Wang, B.; Ren, H. *Chem. Eur. J.* **2011**, *17*, 13665; (b) Hafner, A.; Bräse, S. *Angew. Chem. Int. Ed.* **2012**, *51*, 3713; (c) Wang, C.; Chen, H.; Wang, Z.; Chen, J.; Huang, Y. *Angew. Chem. Int. Ed.* **2012**, *51*, 7242.

NMR spectrum:

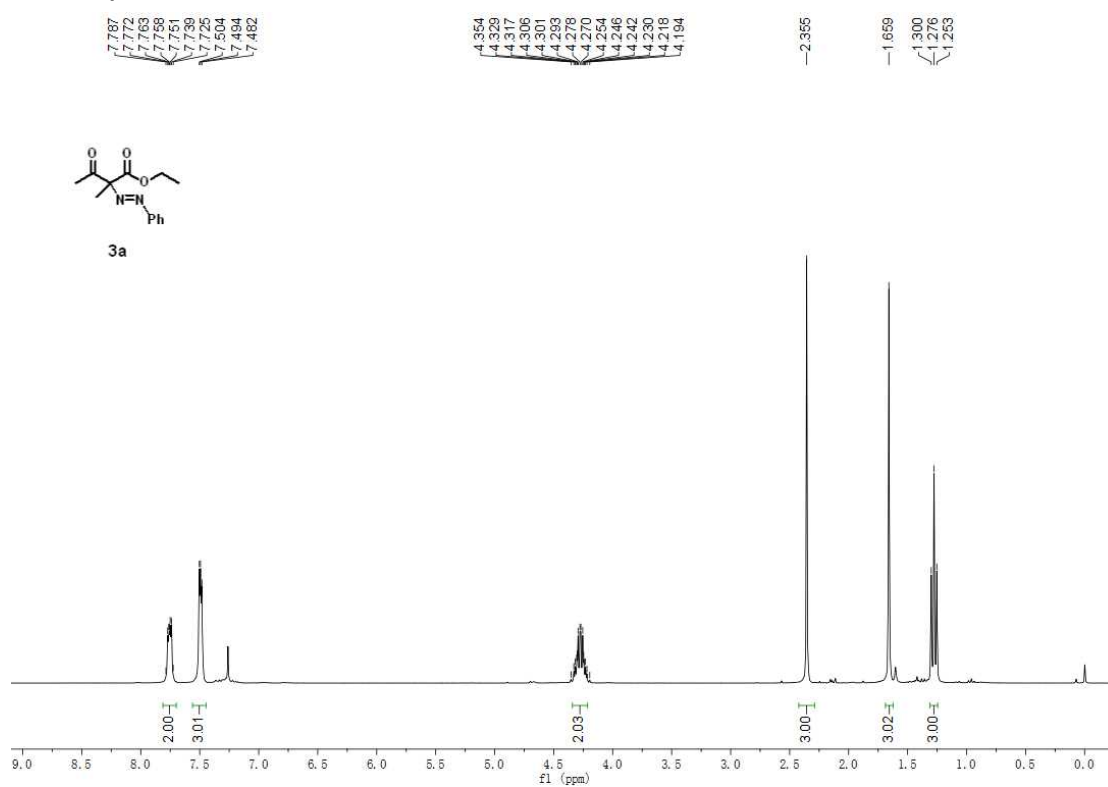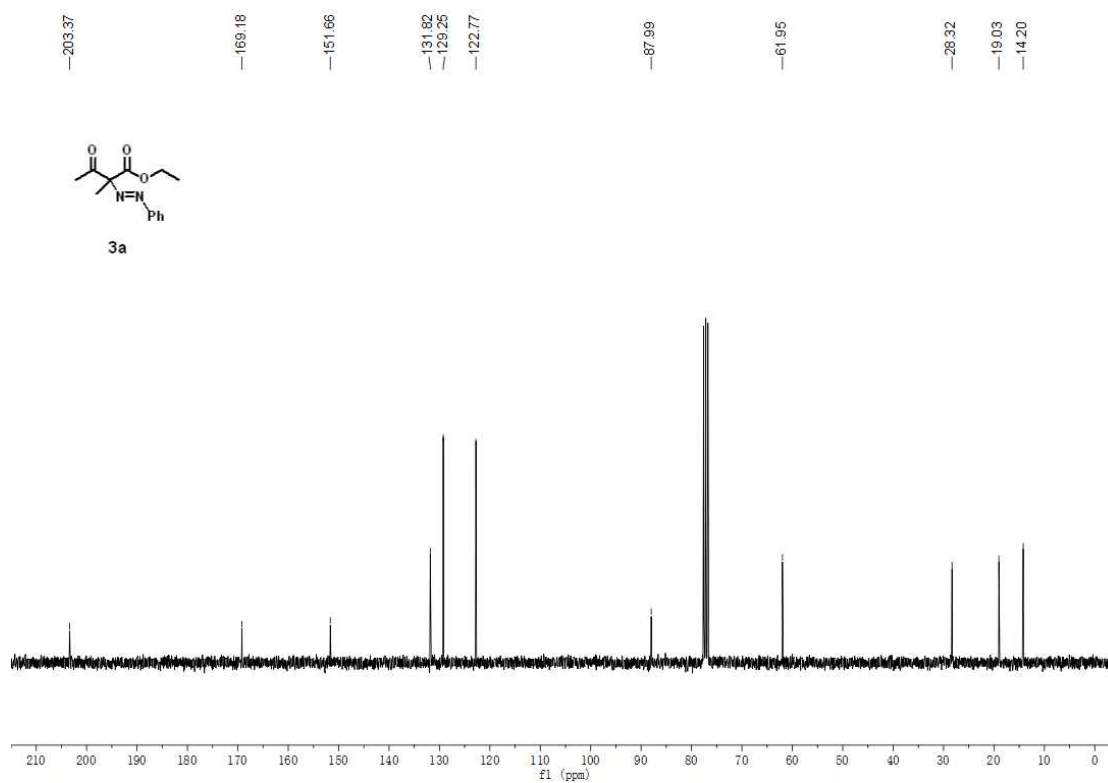

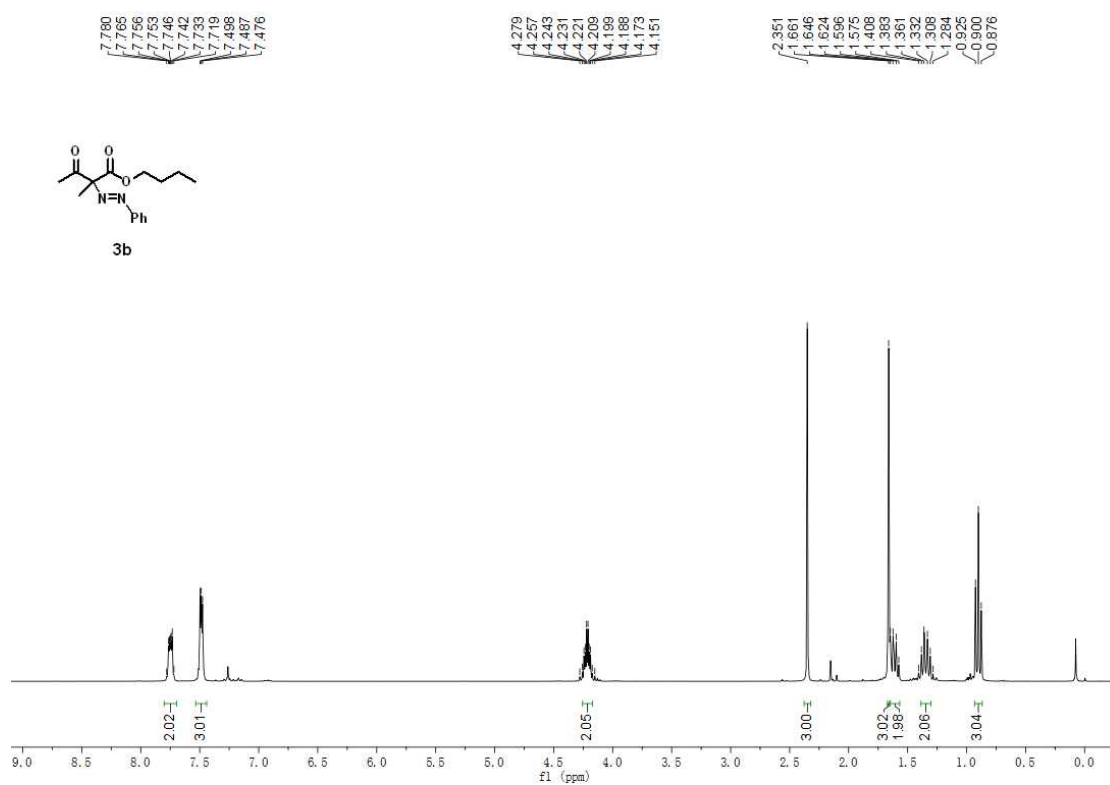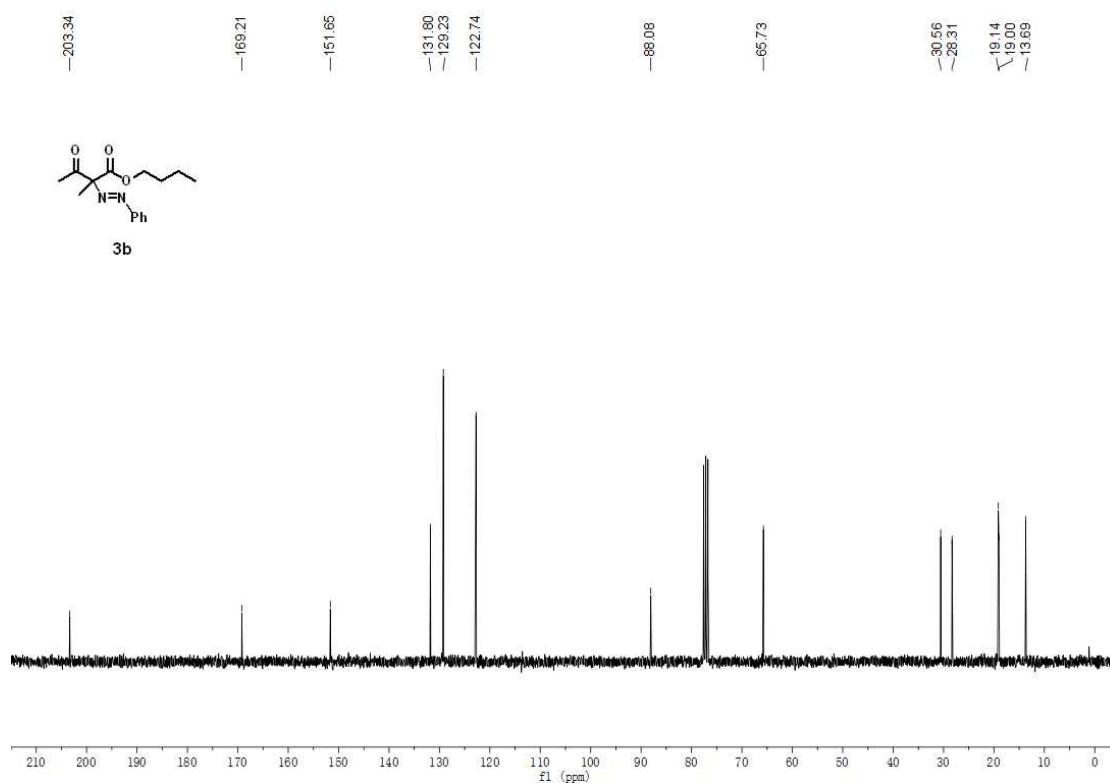

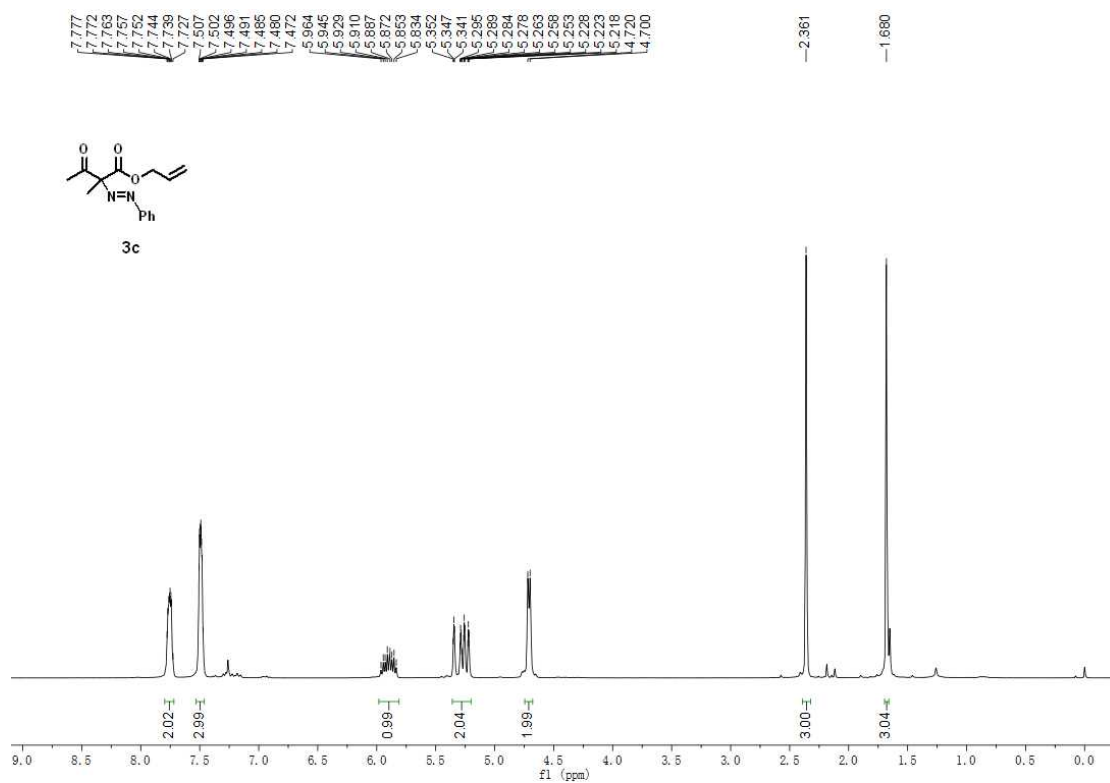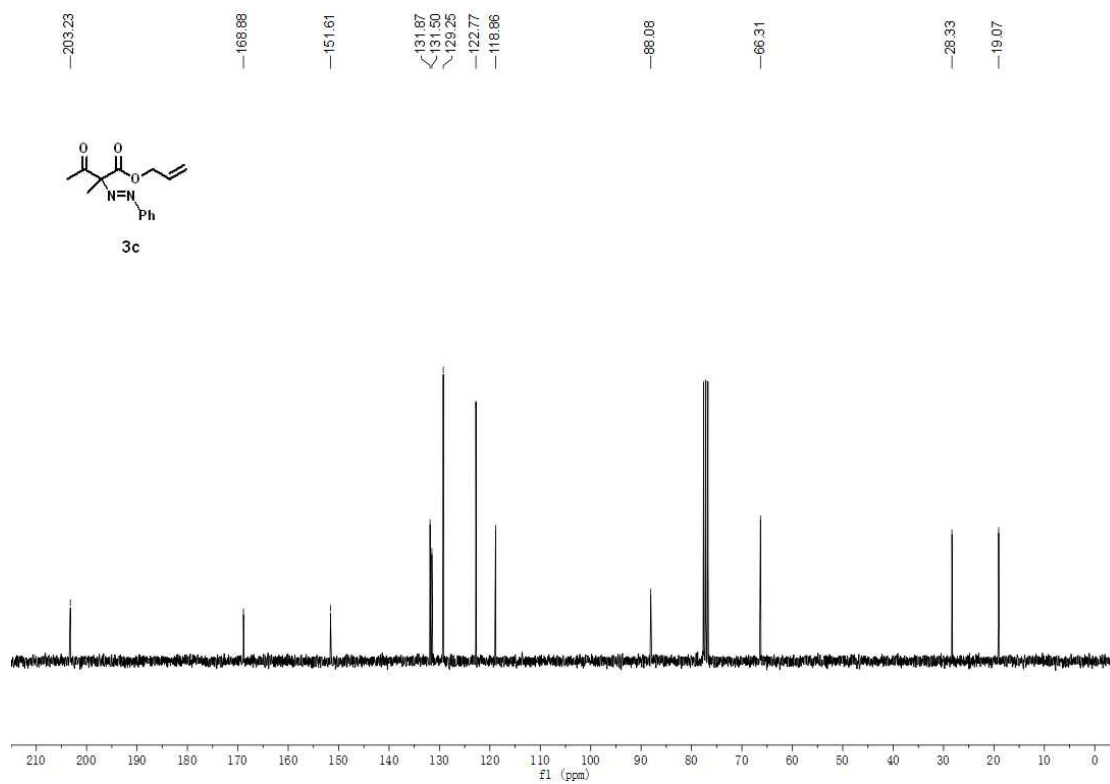



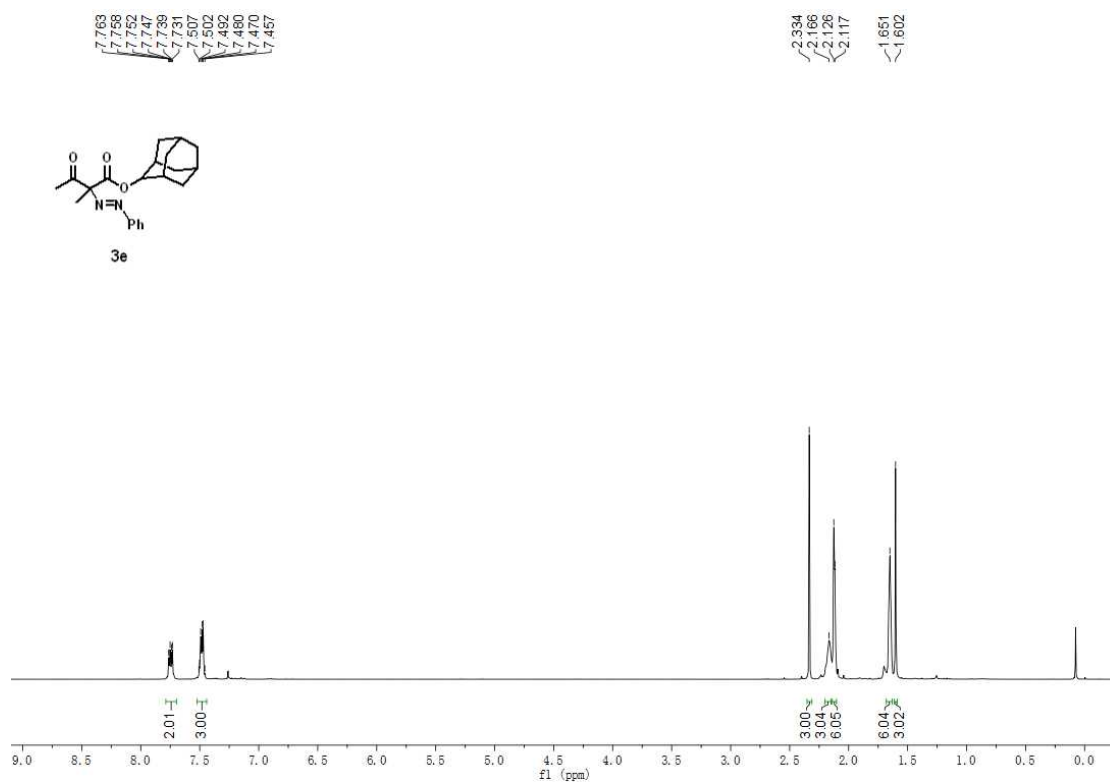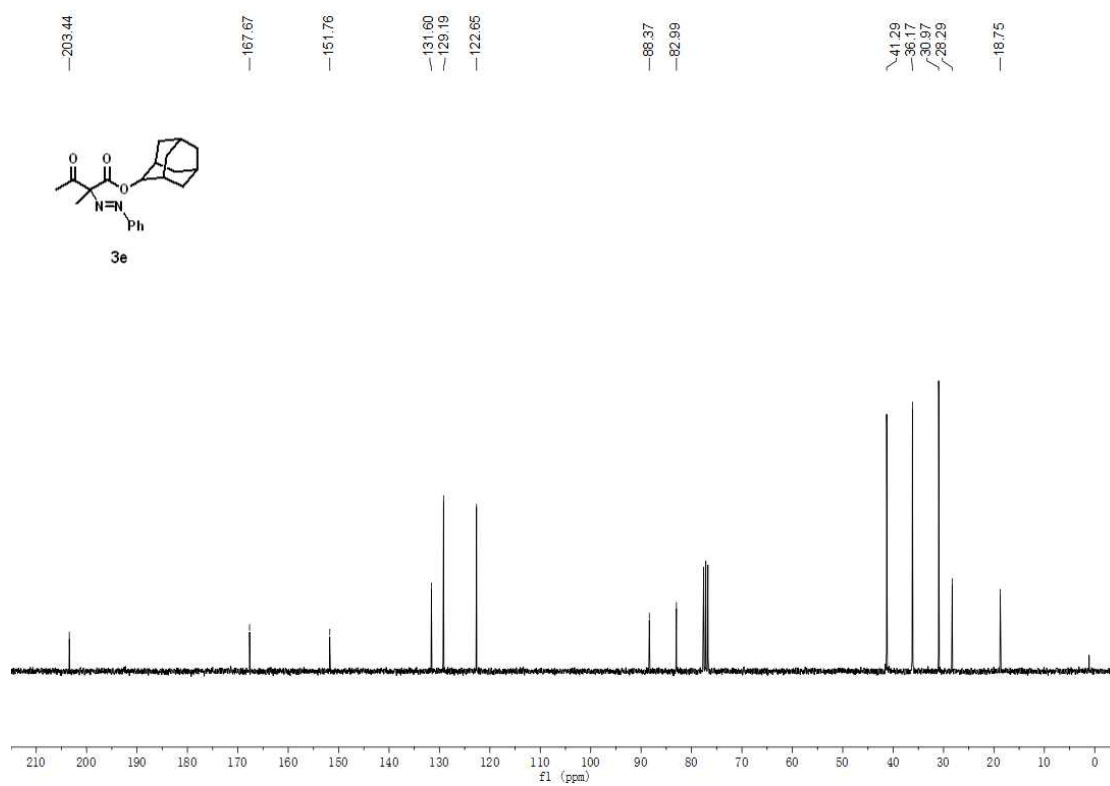

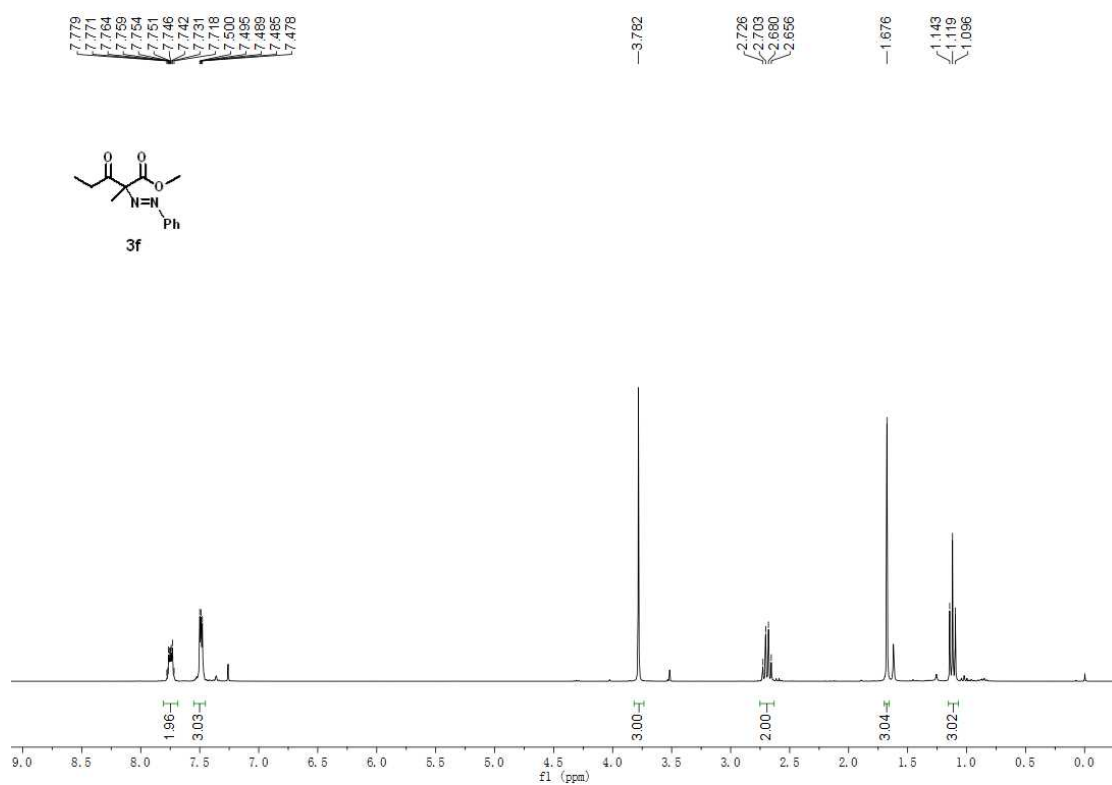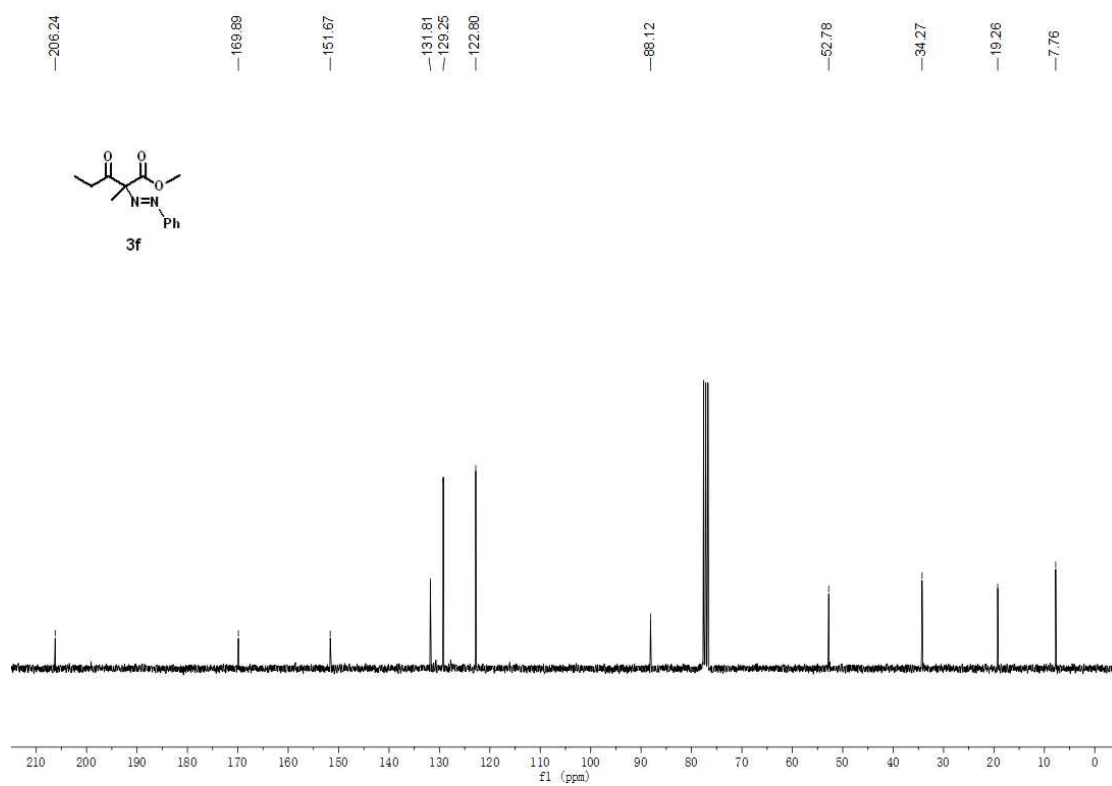

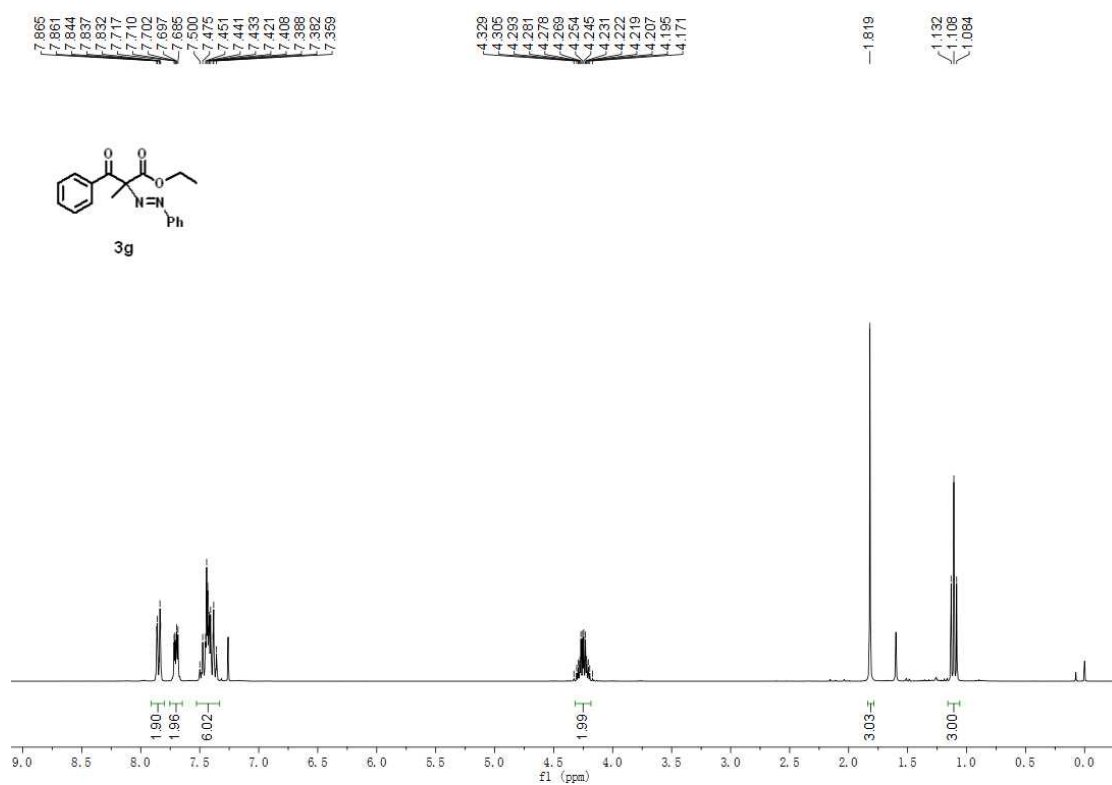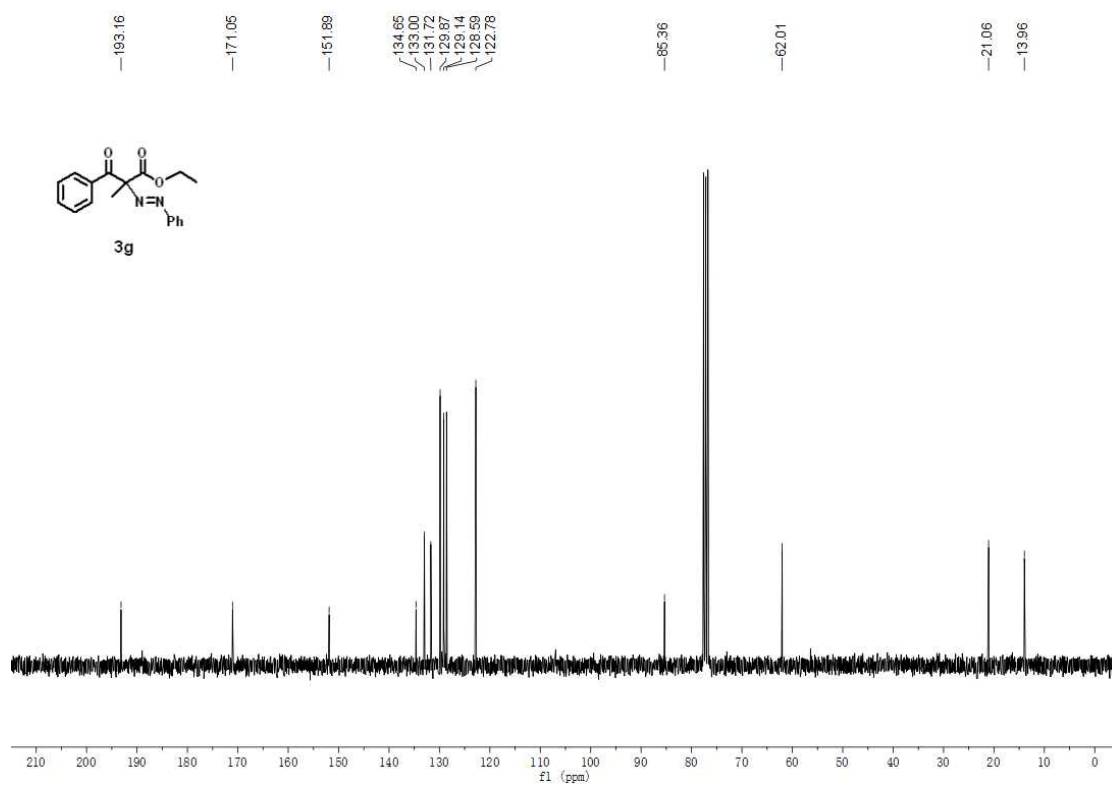



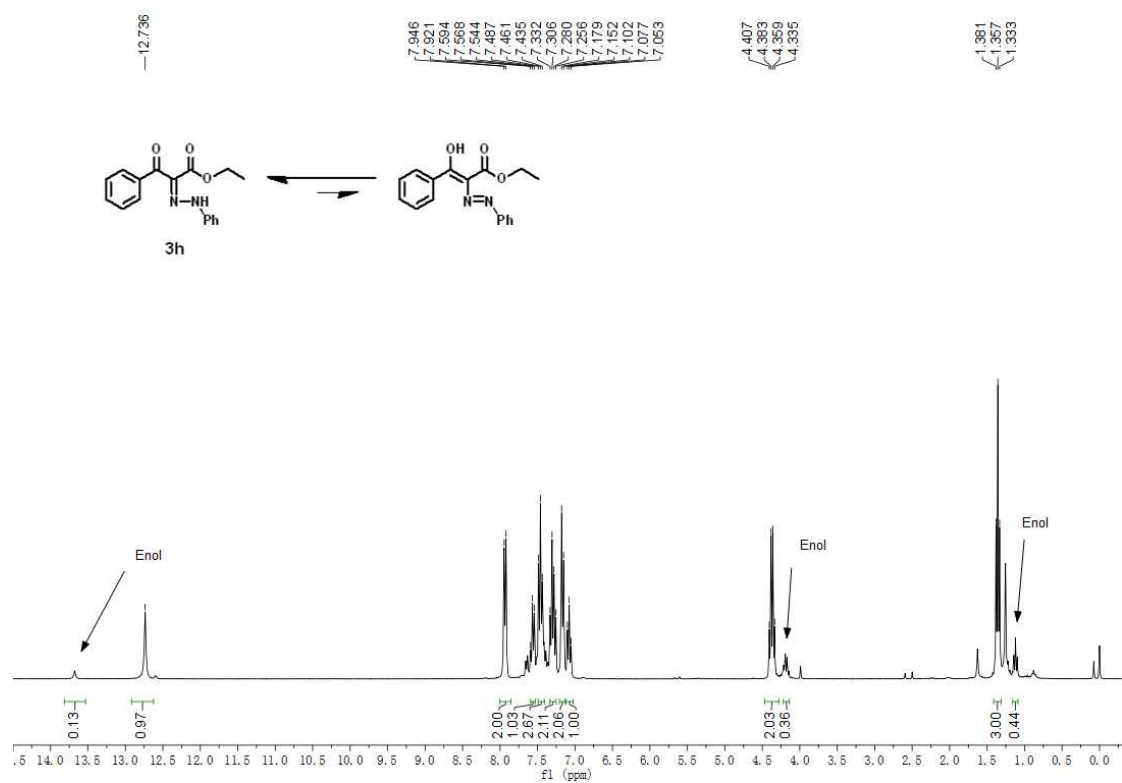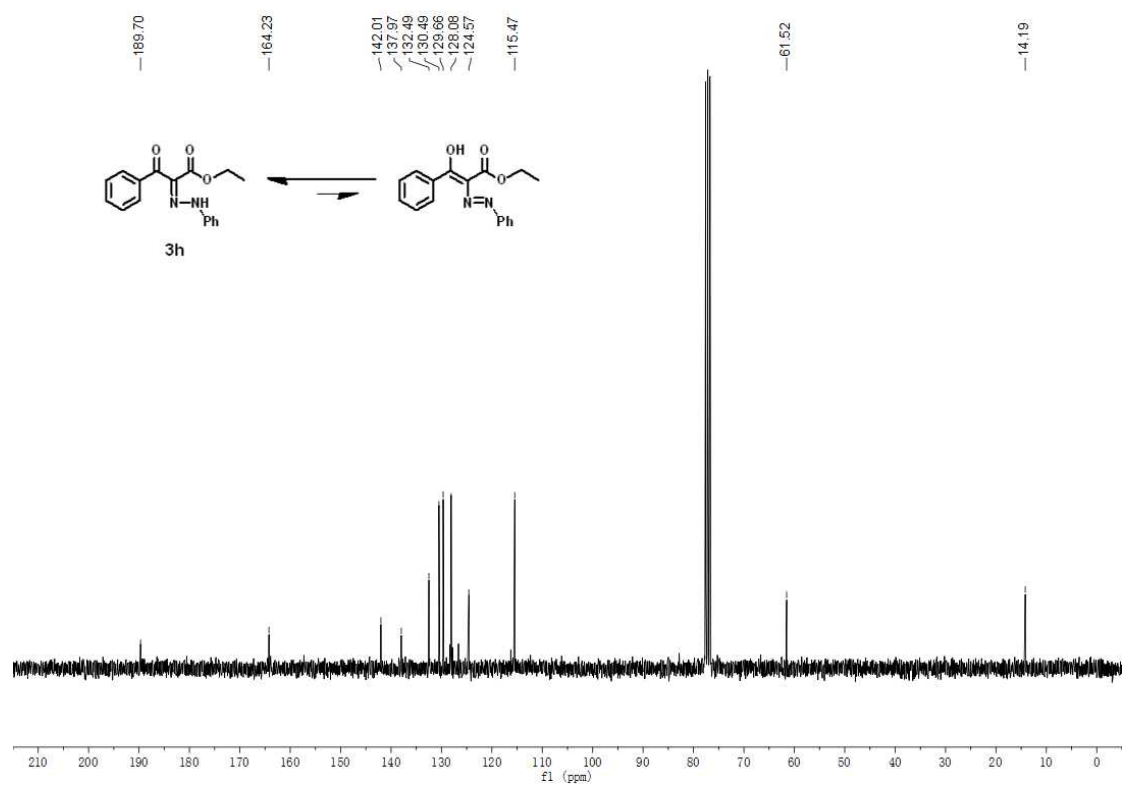

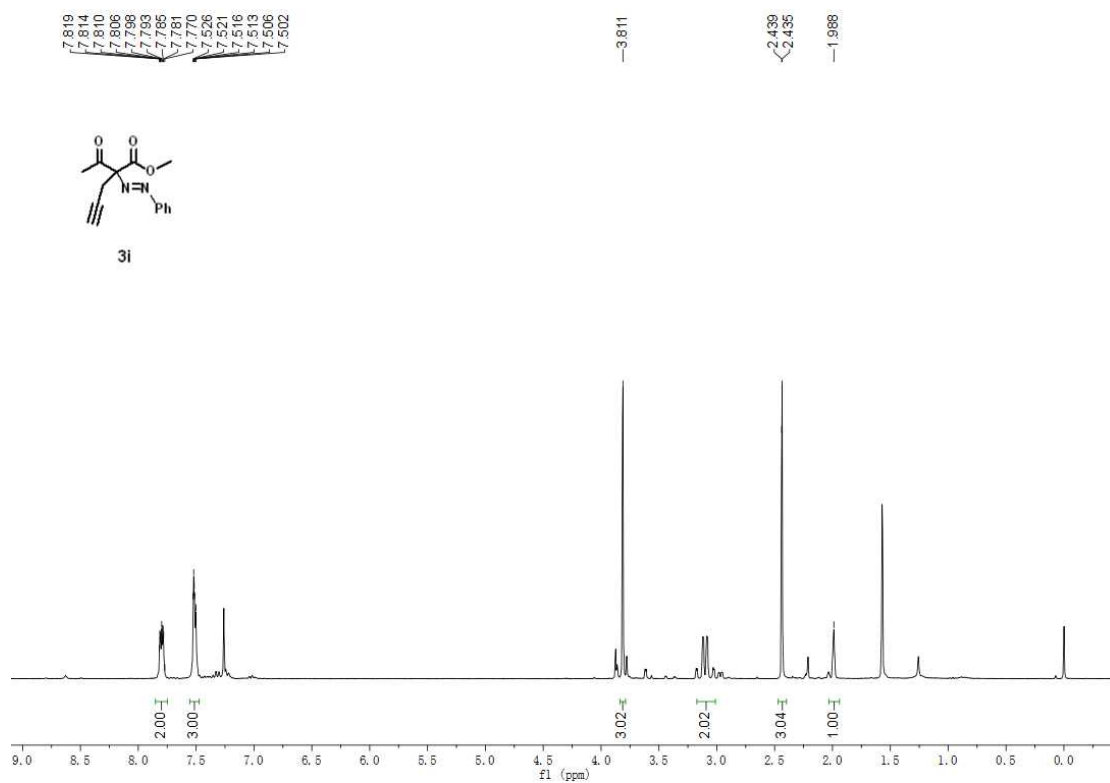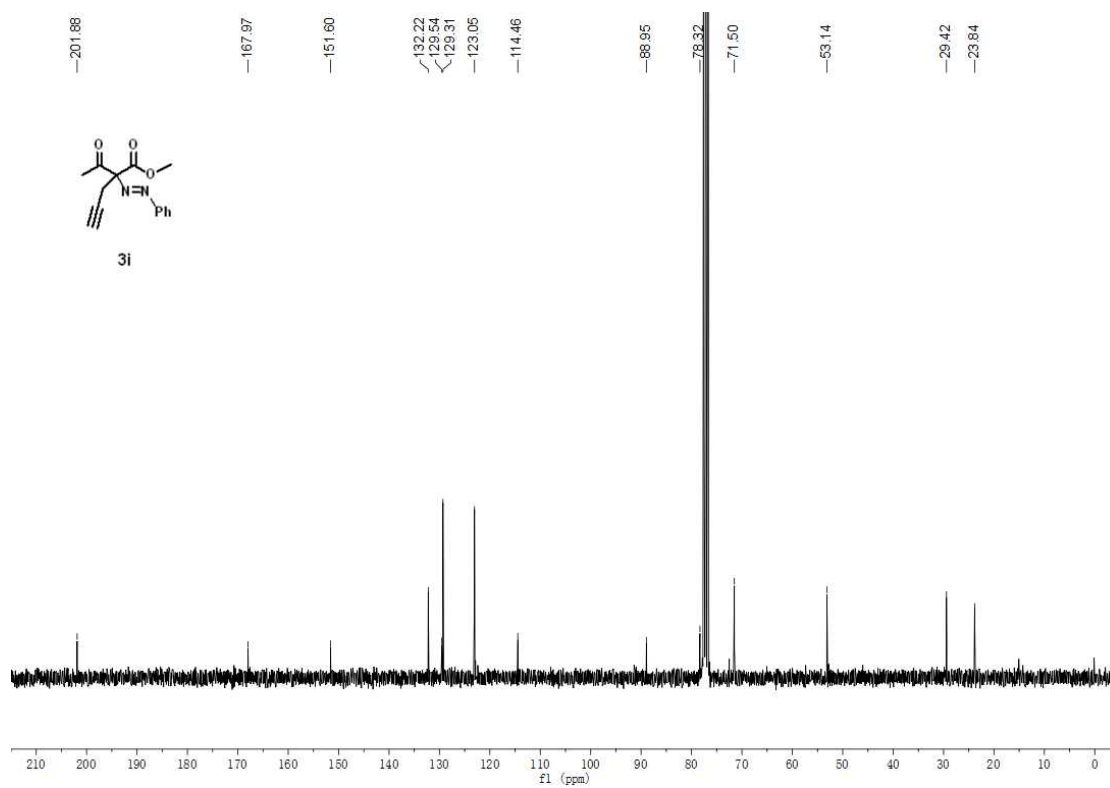

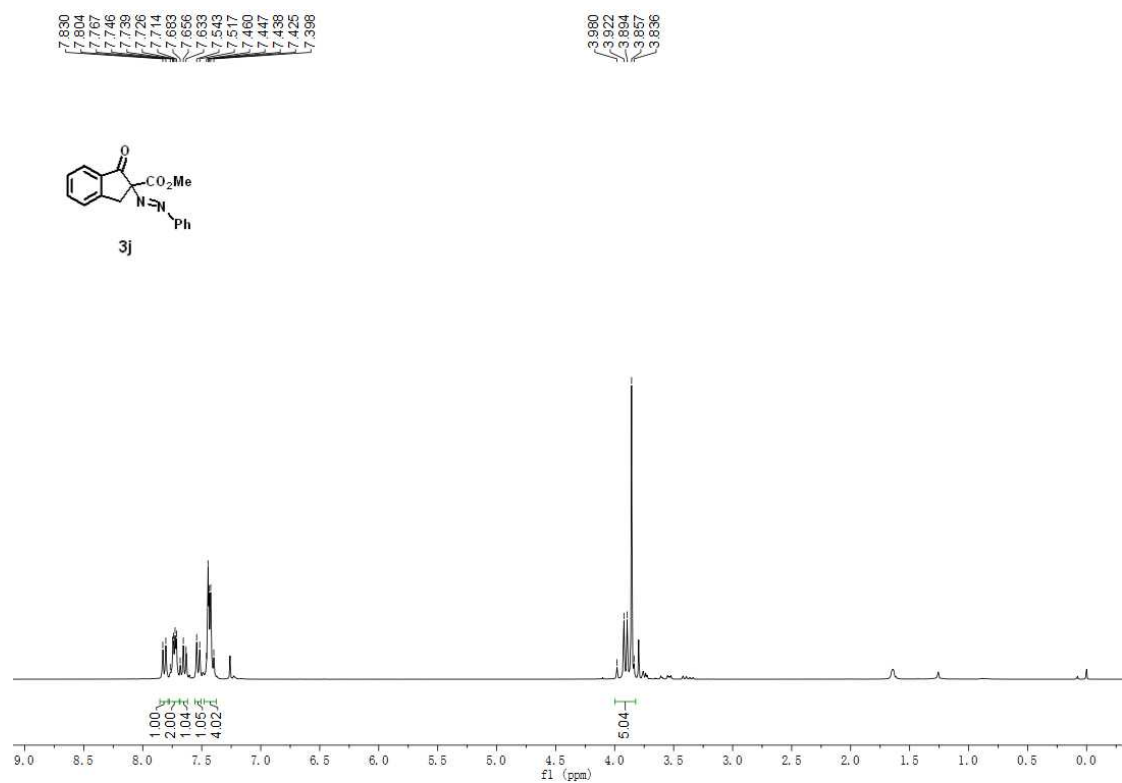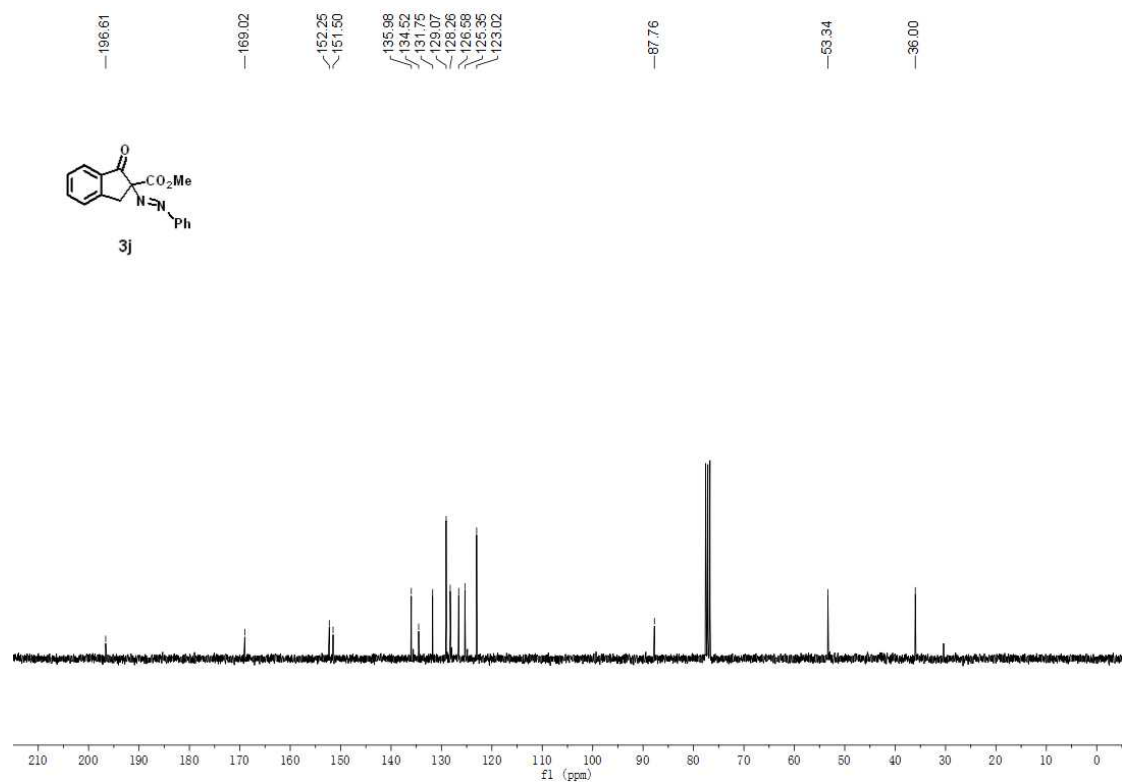

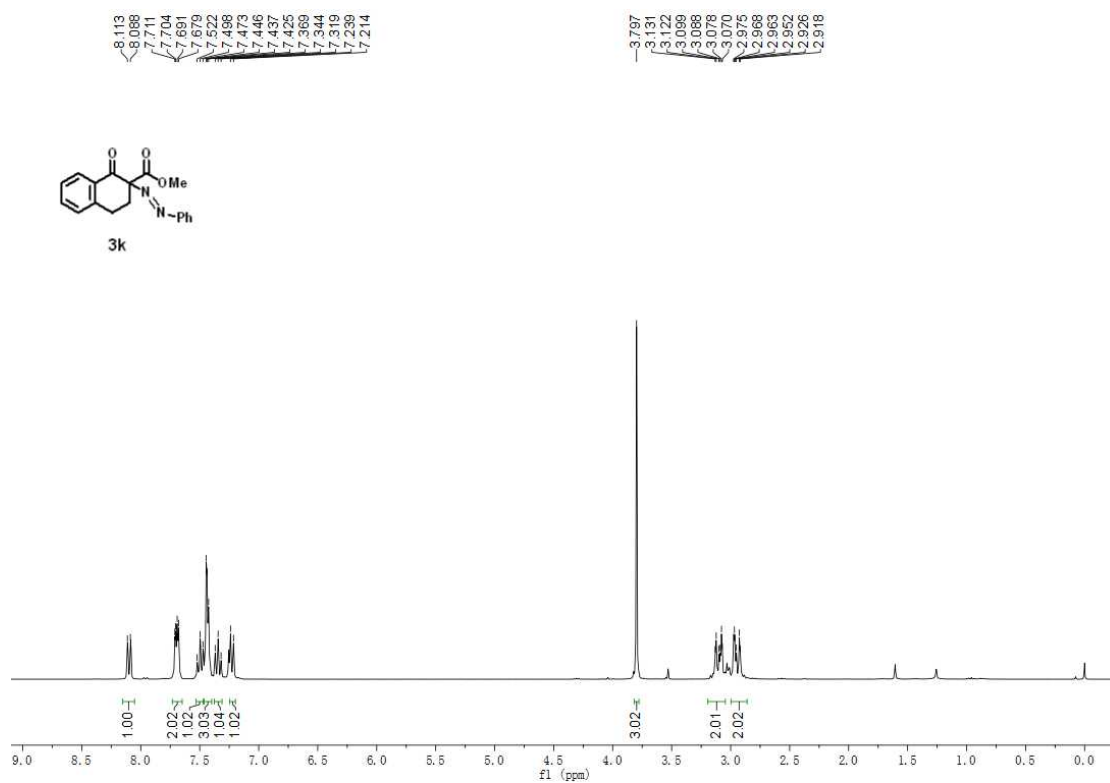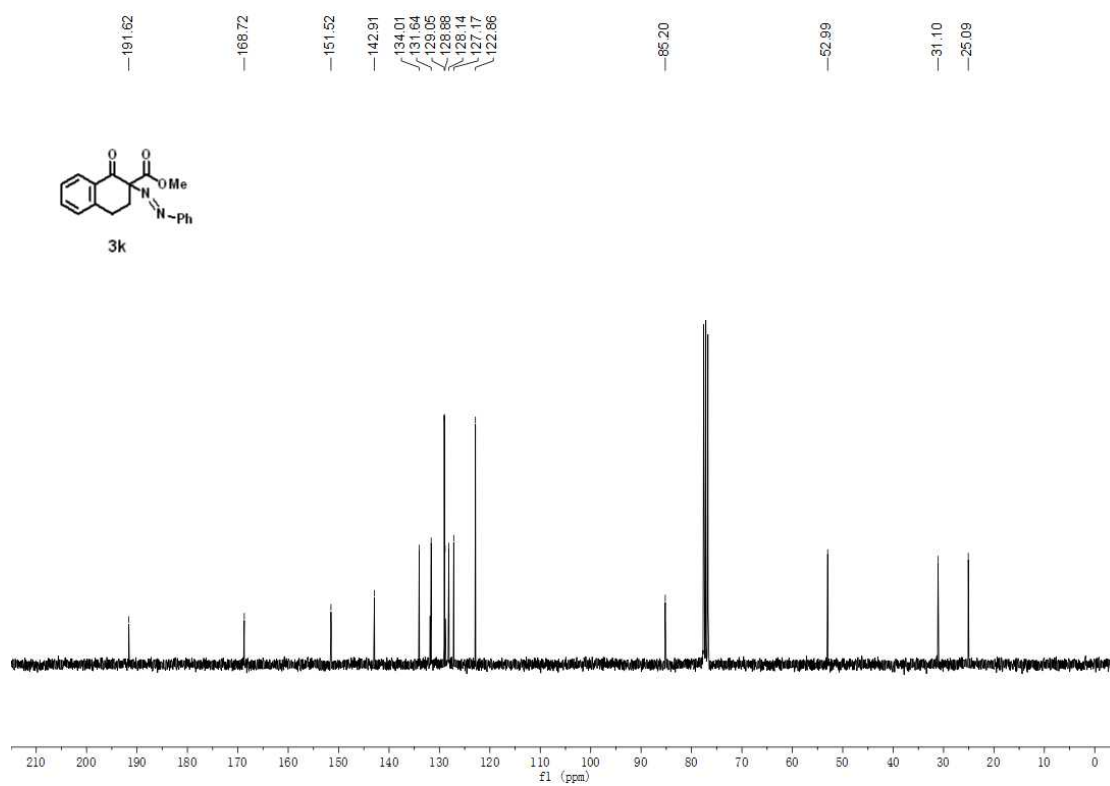

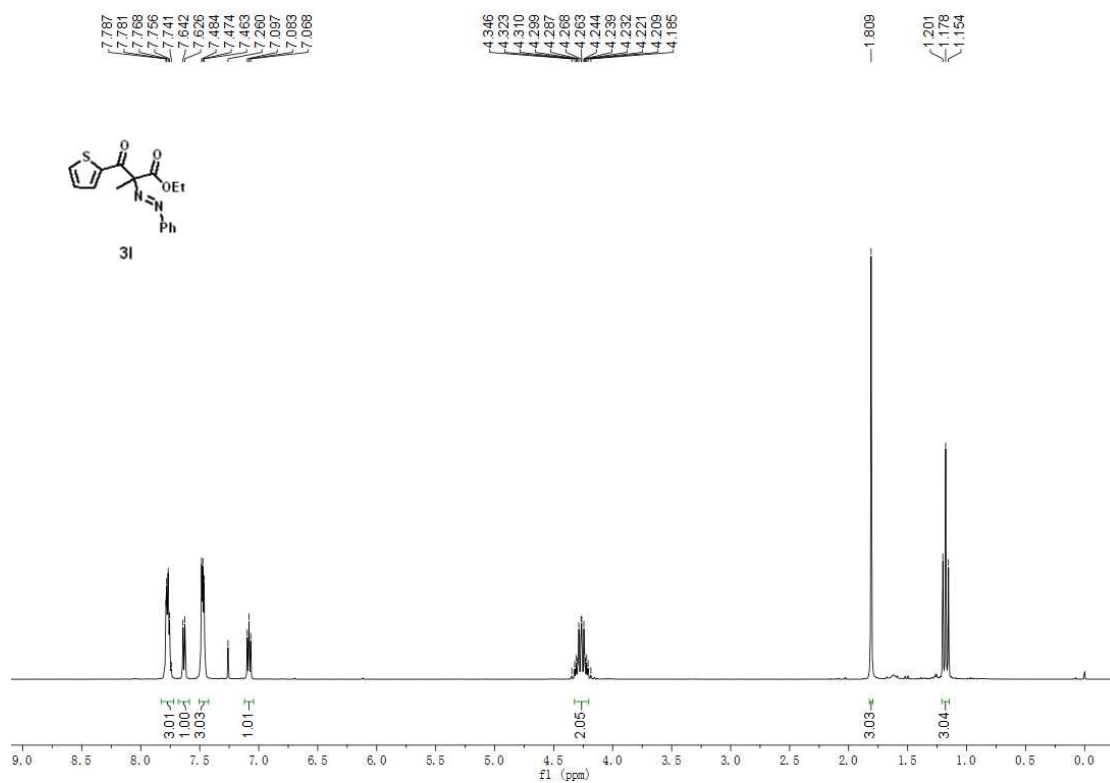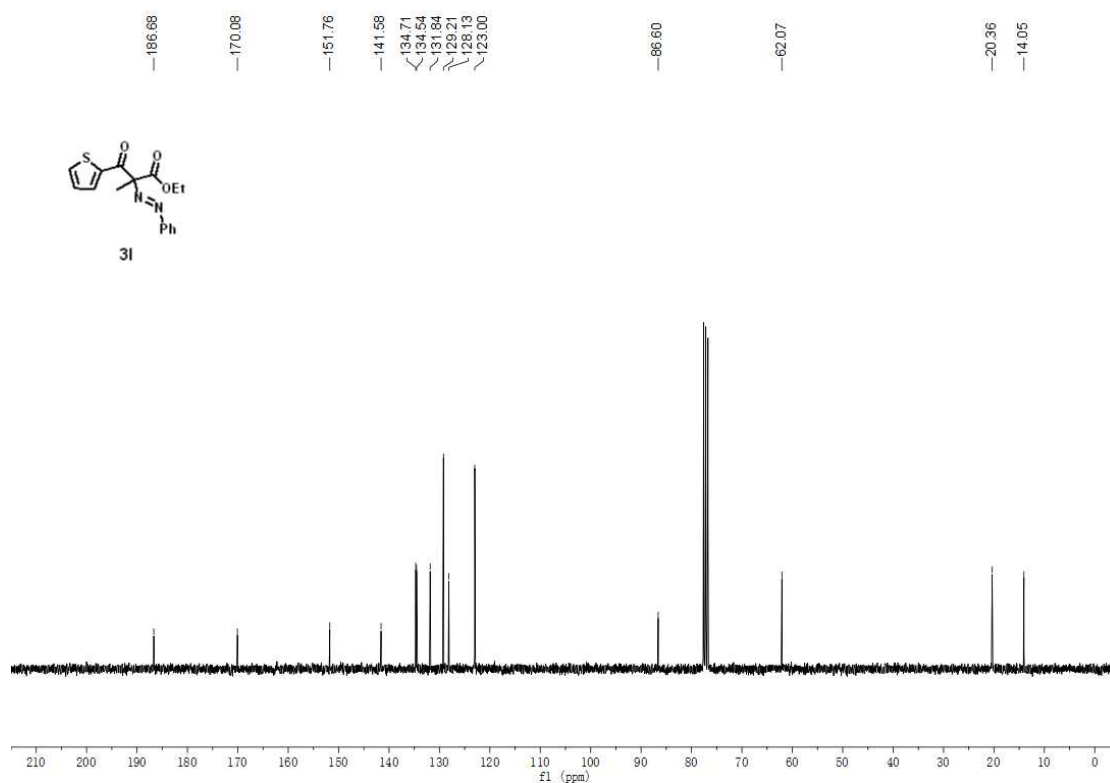

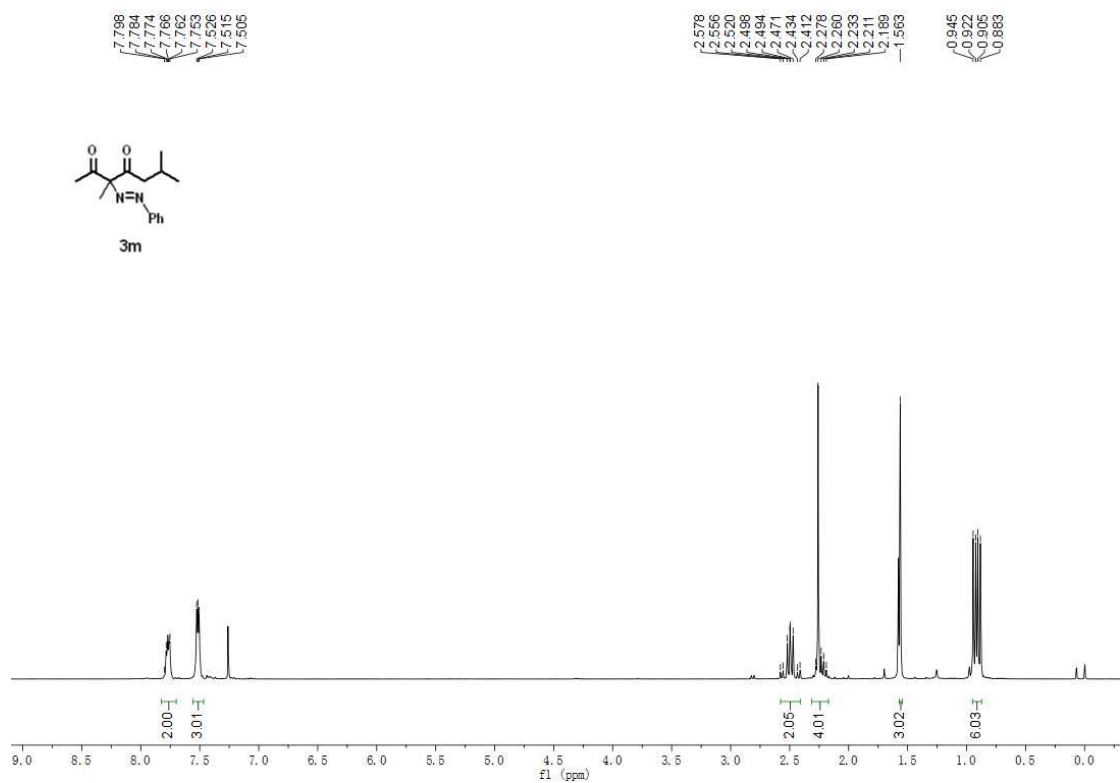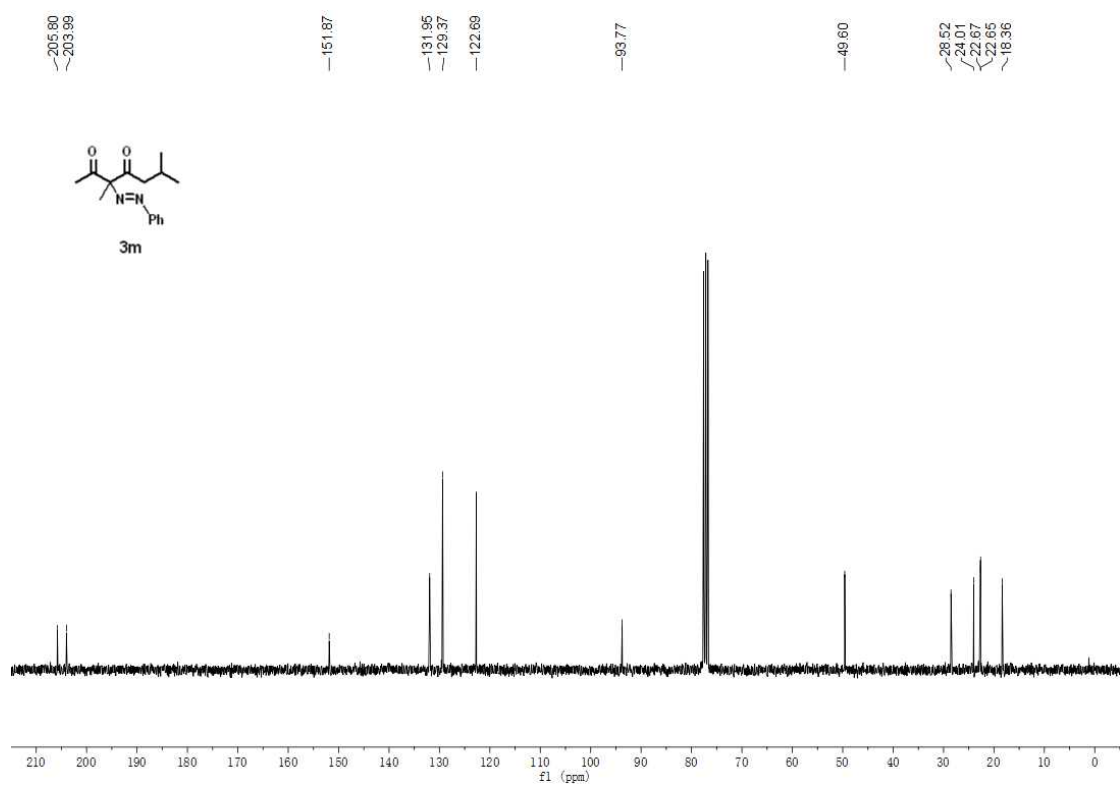

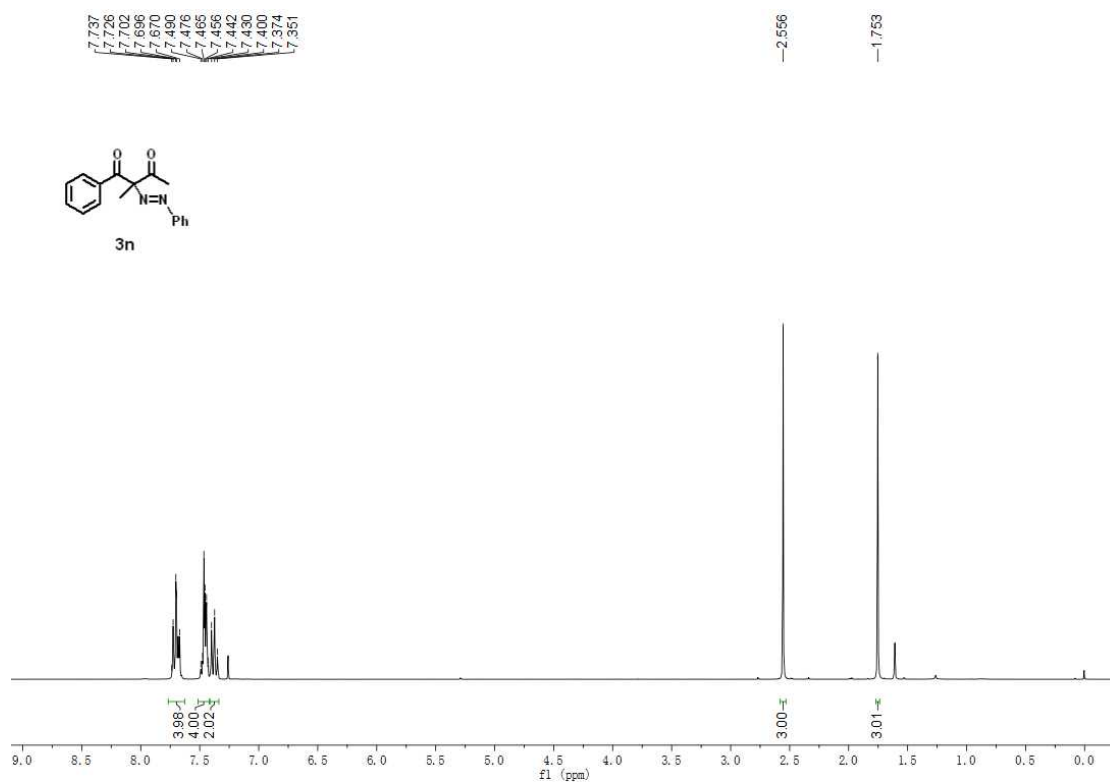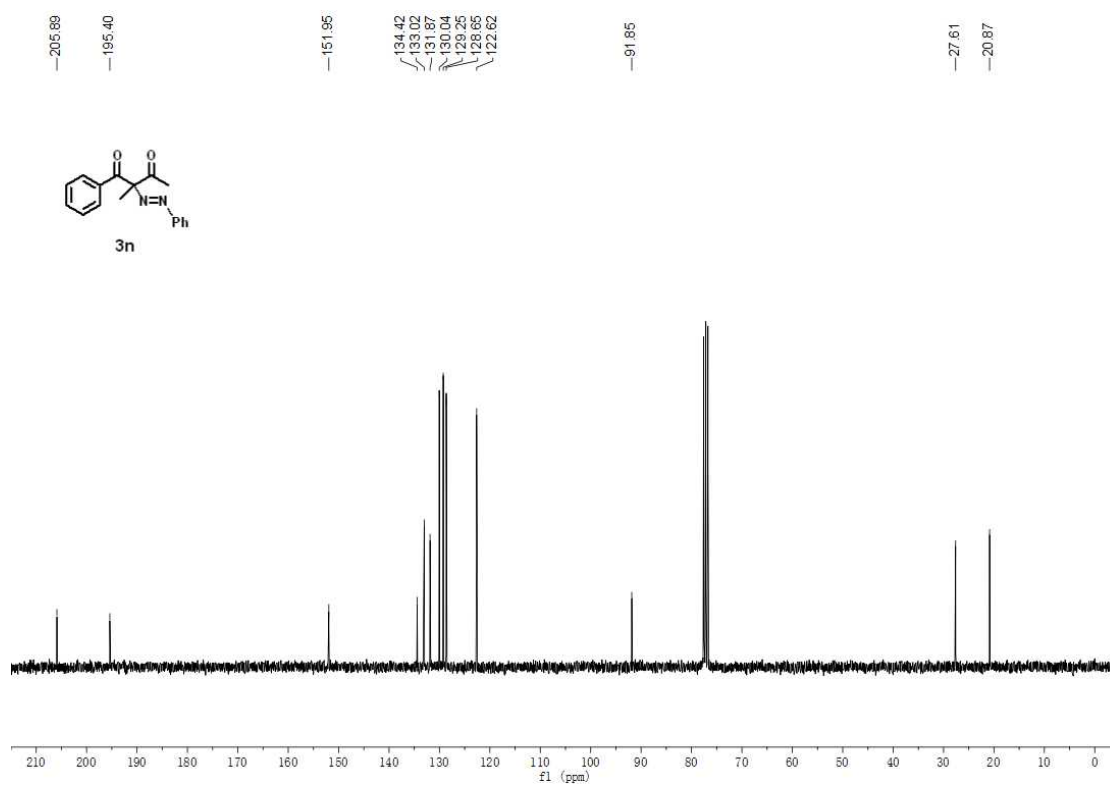

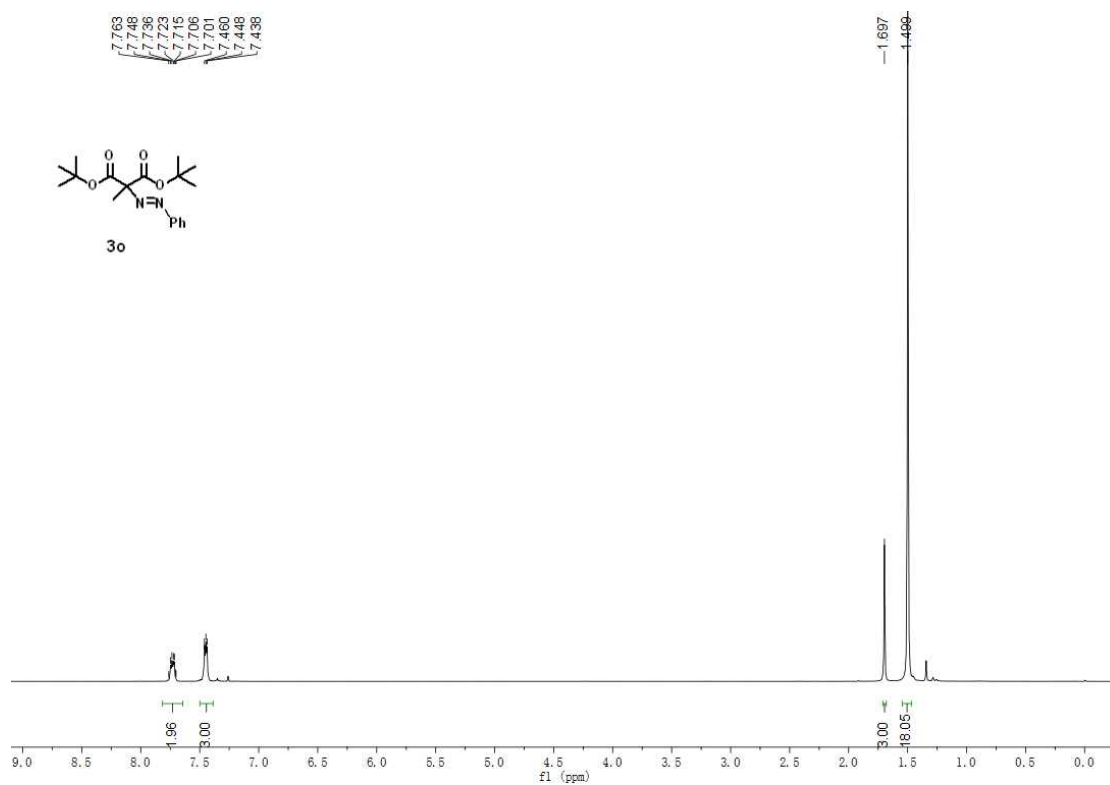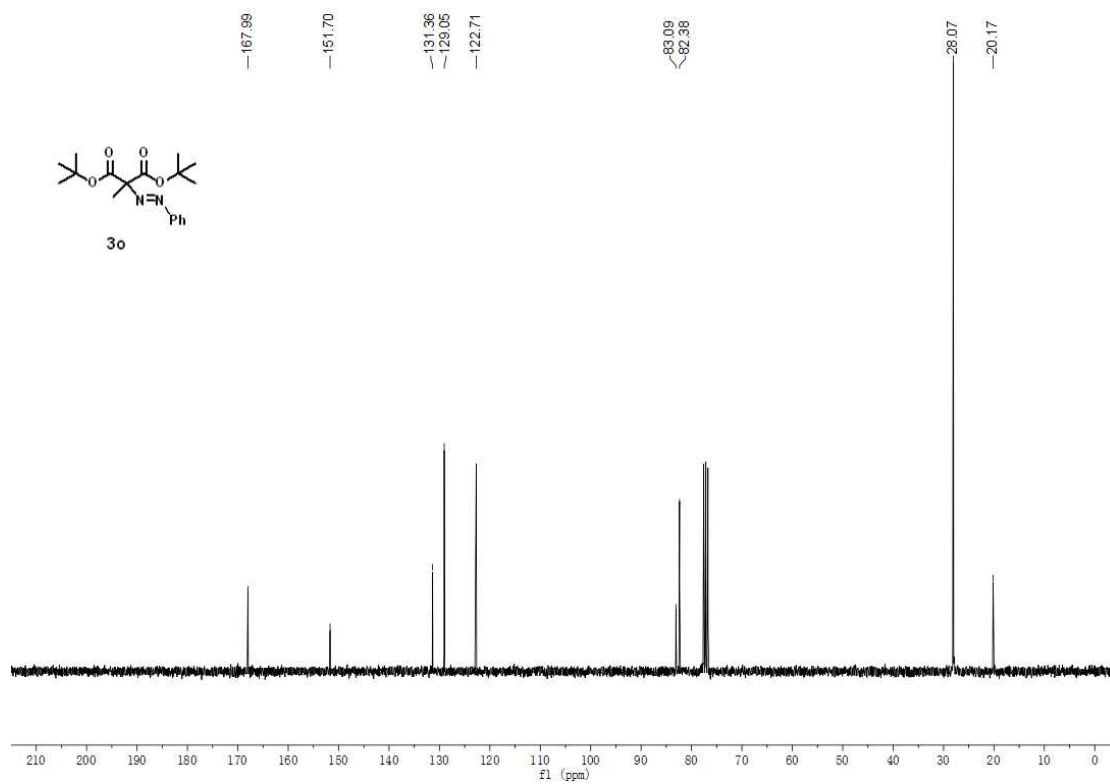



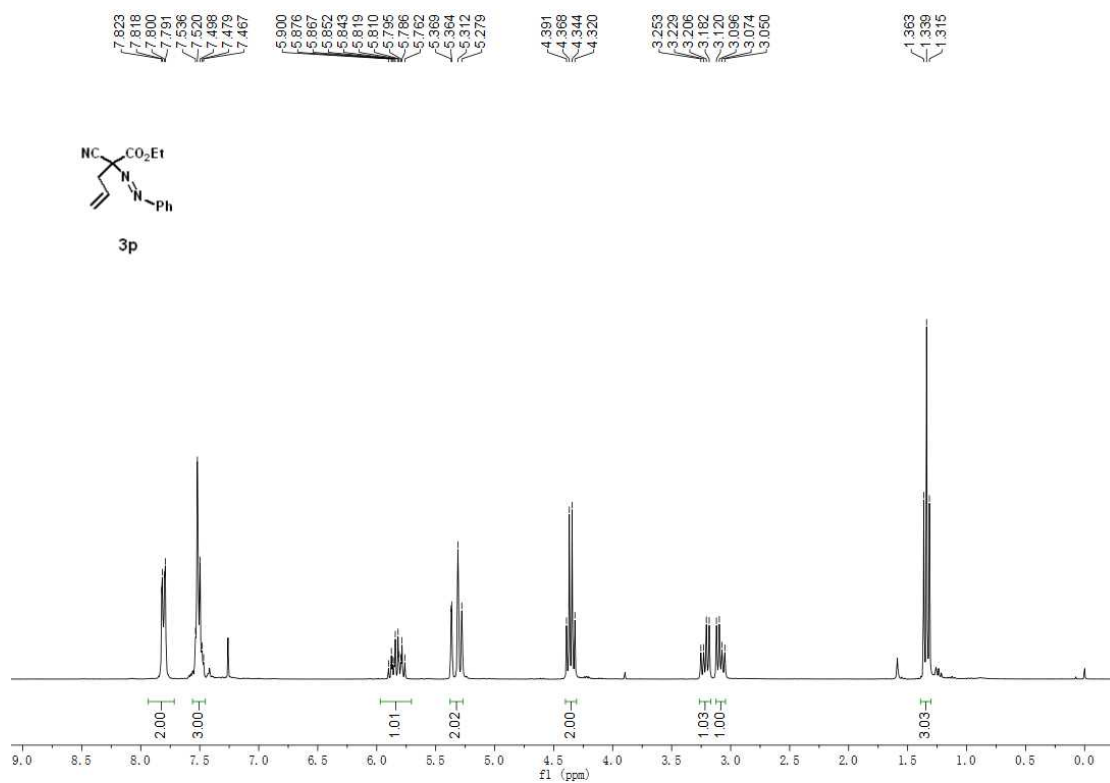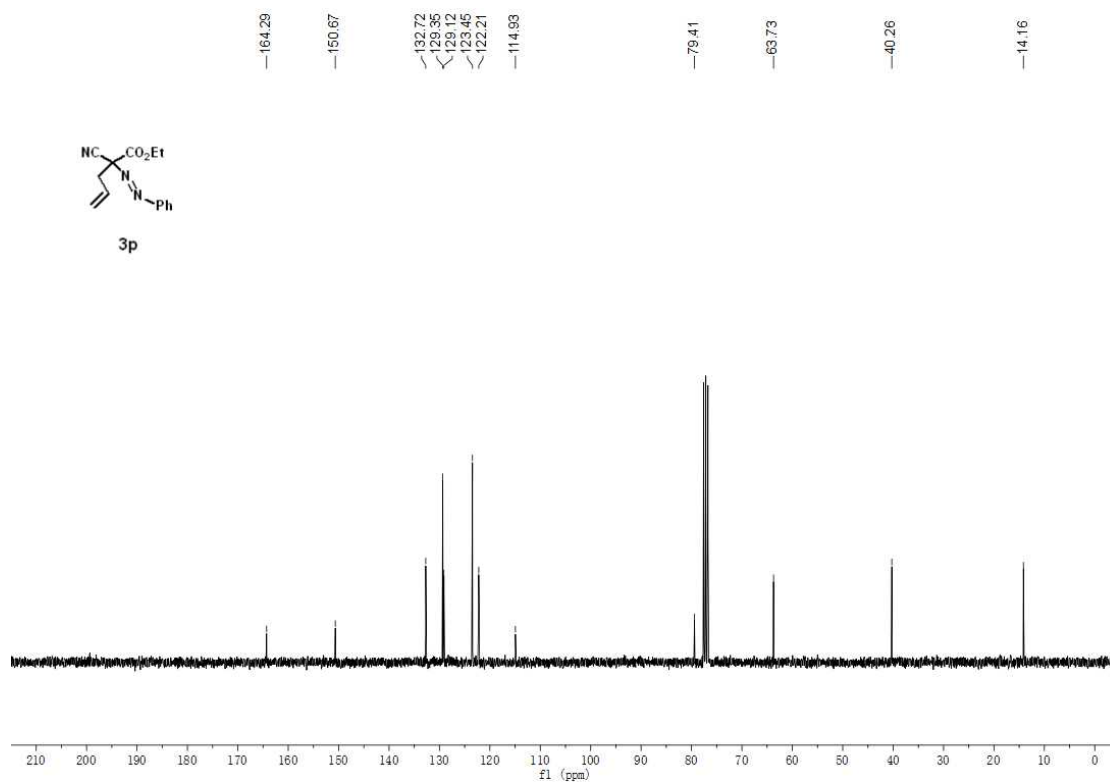

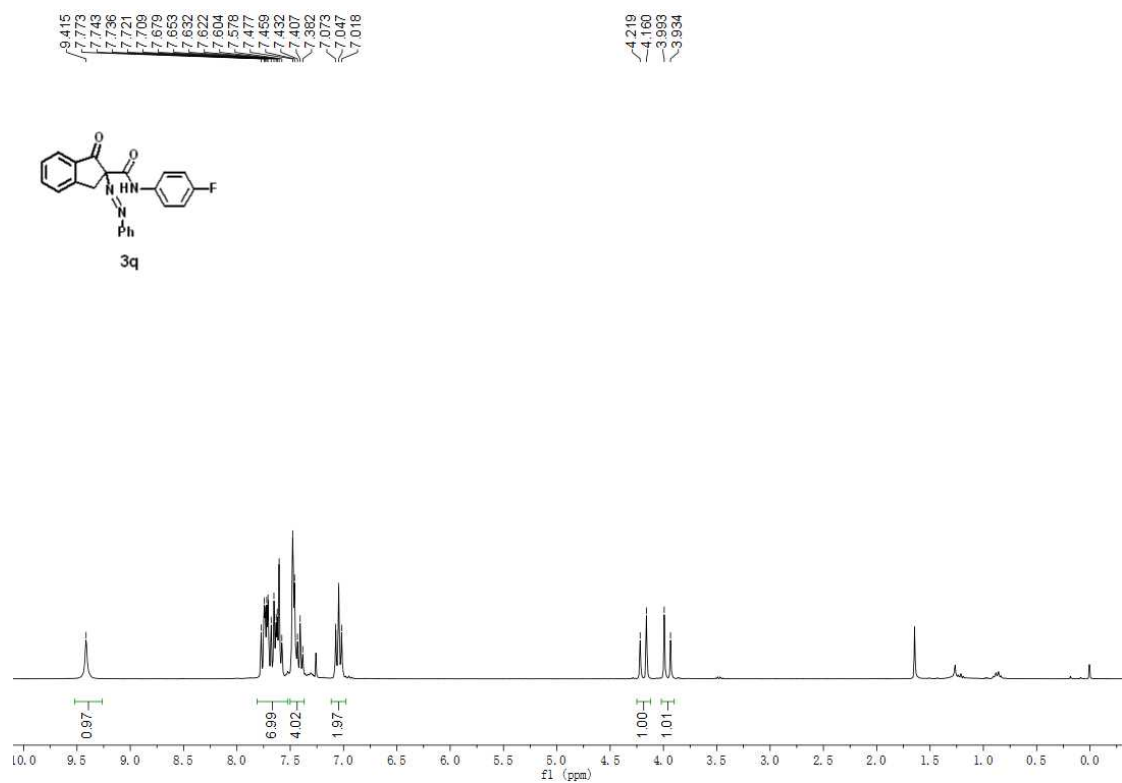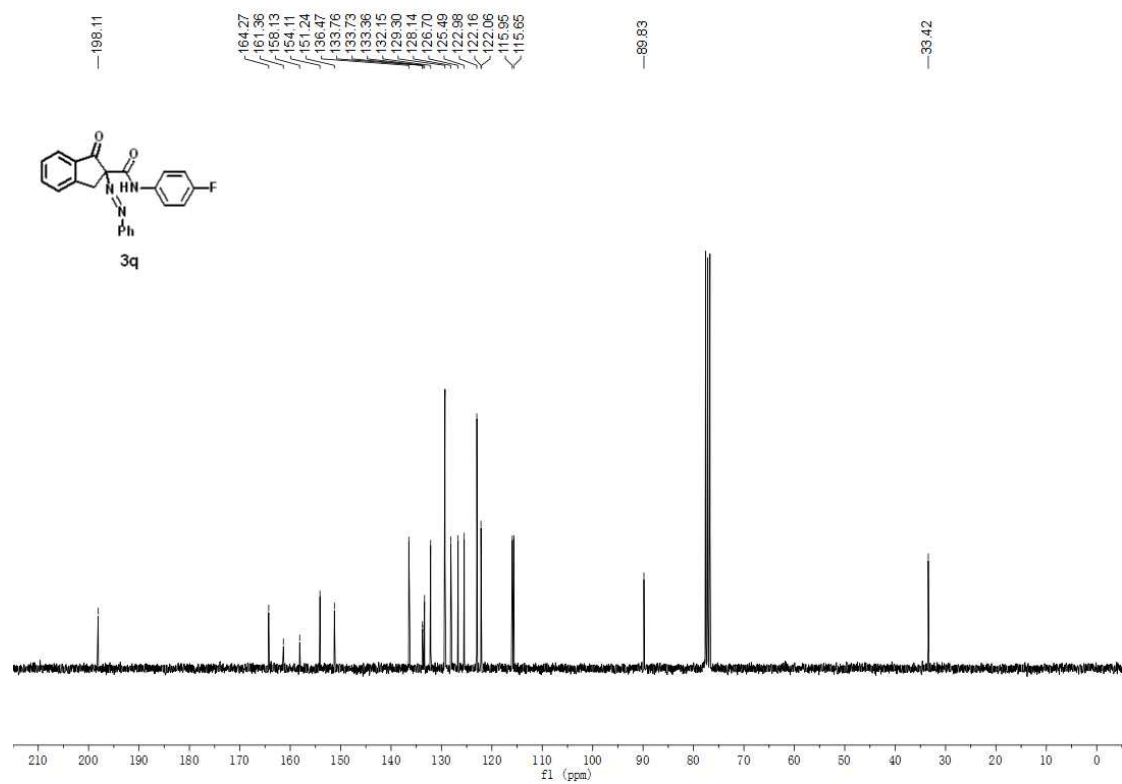

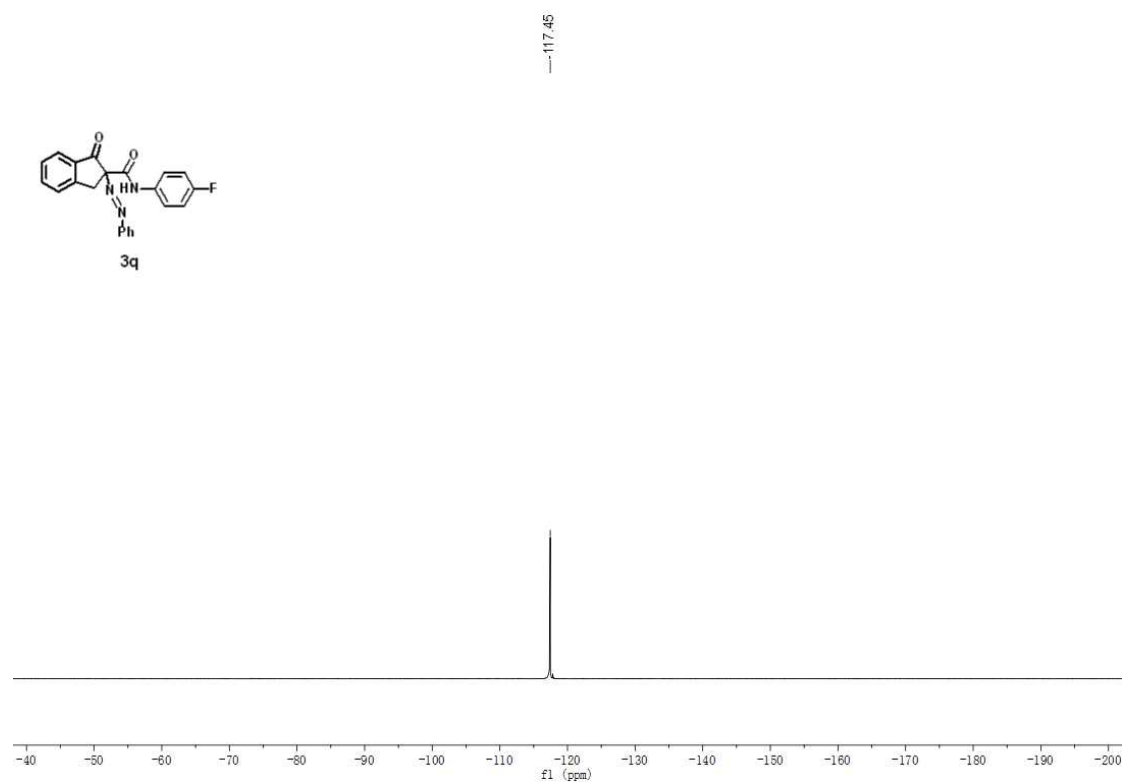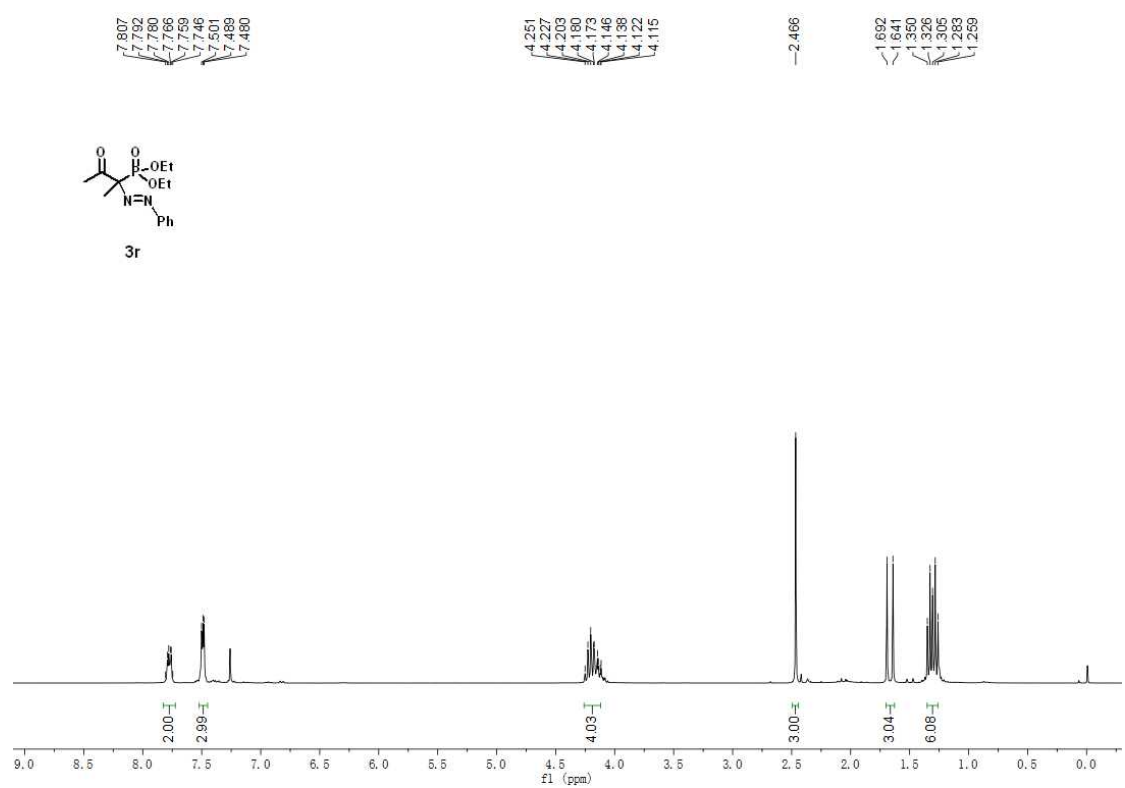

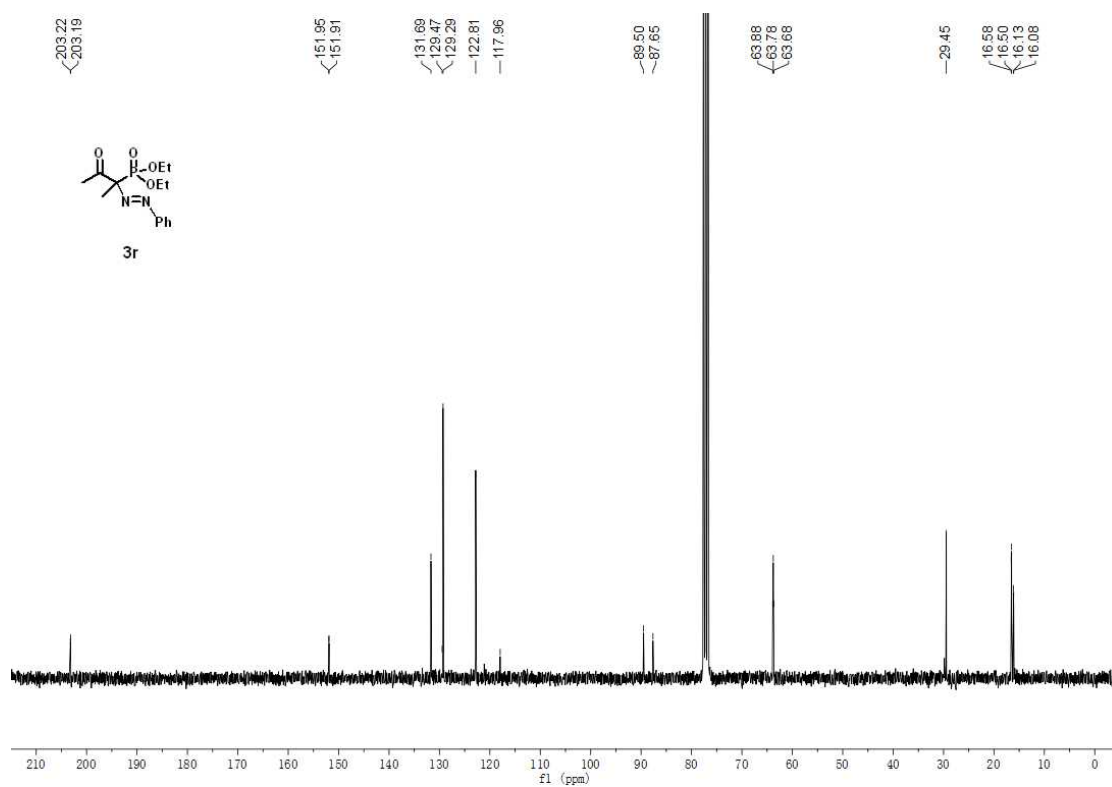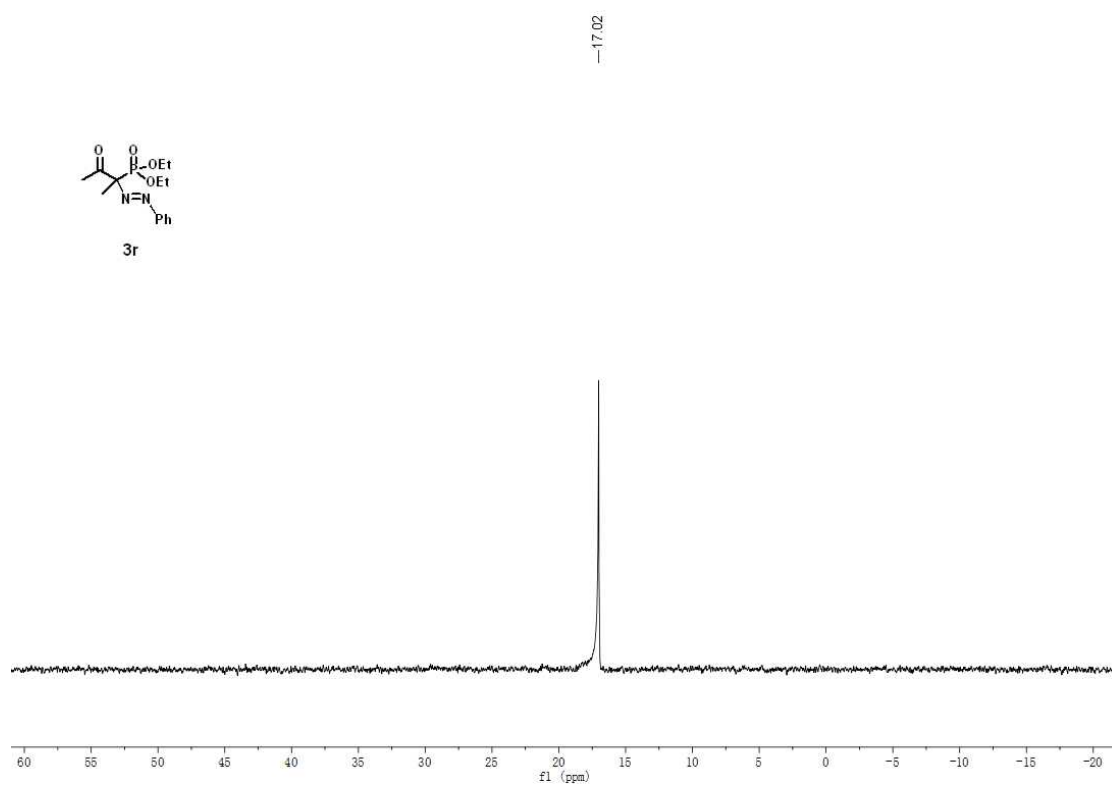

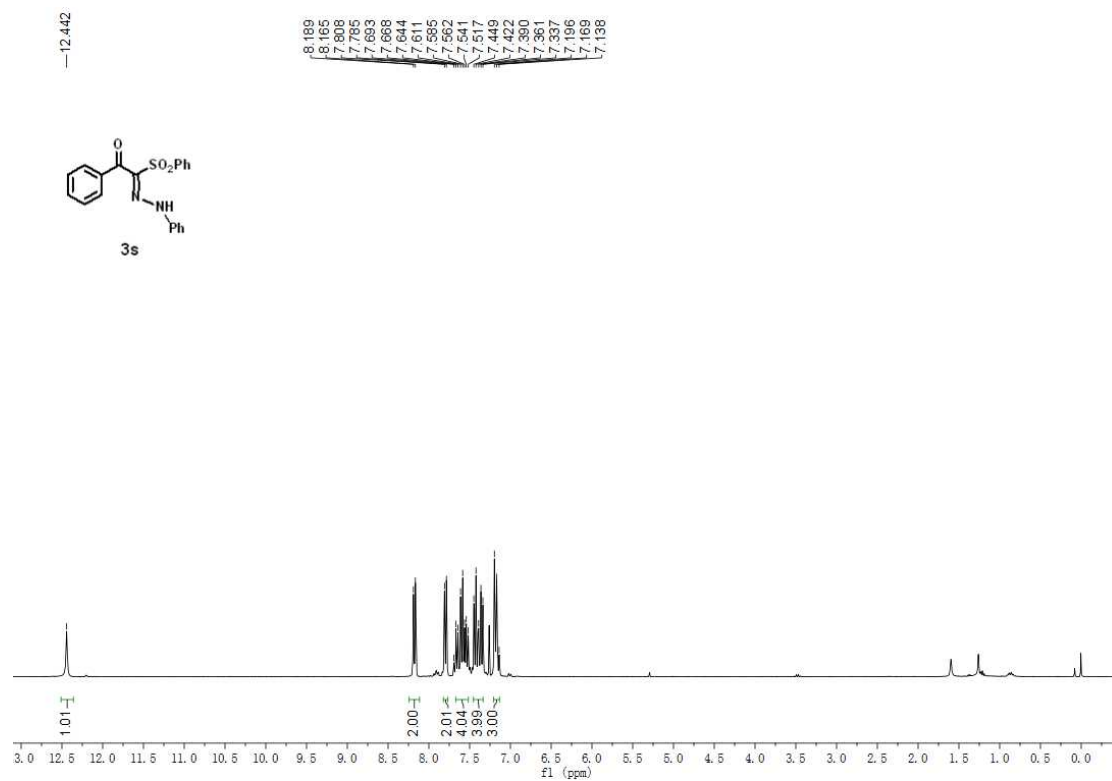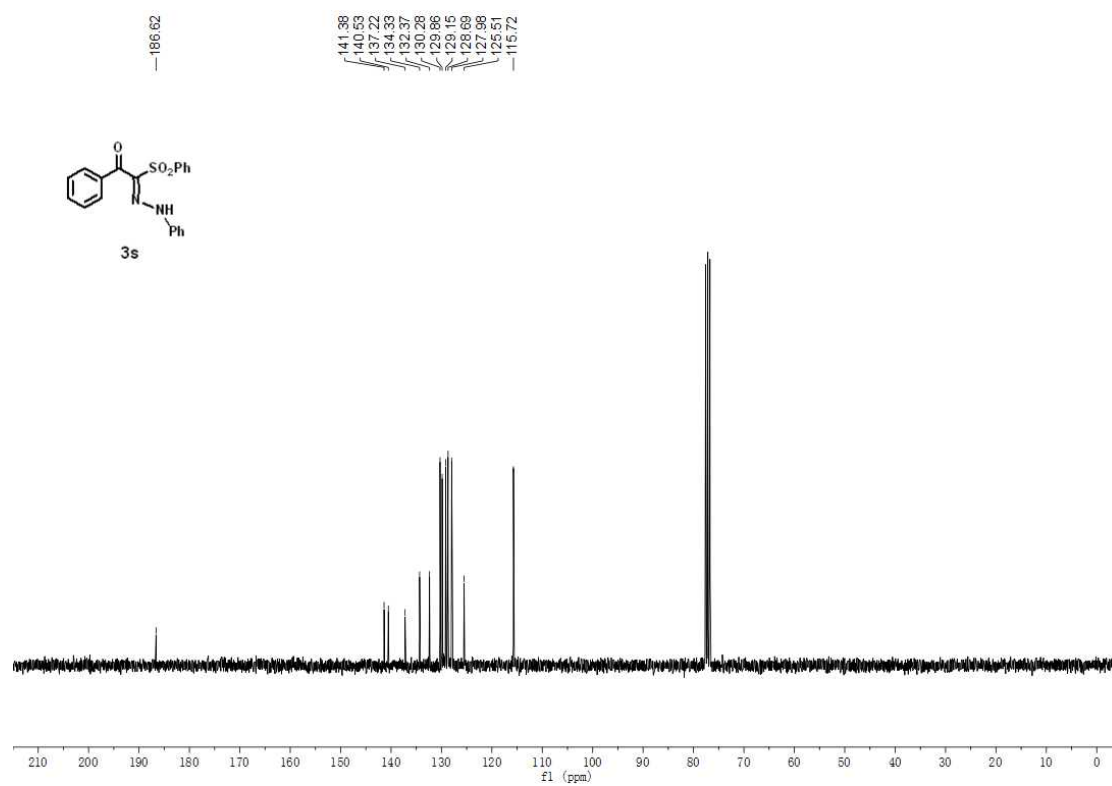

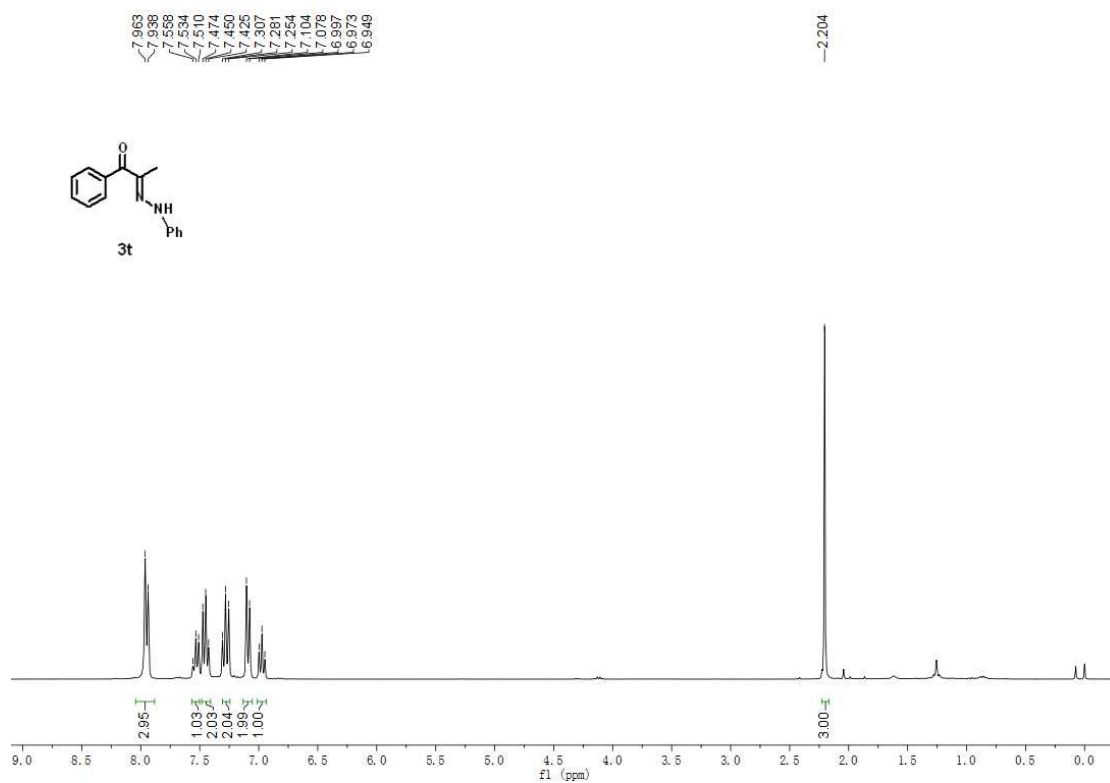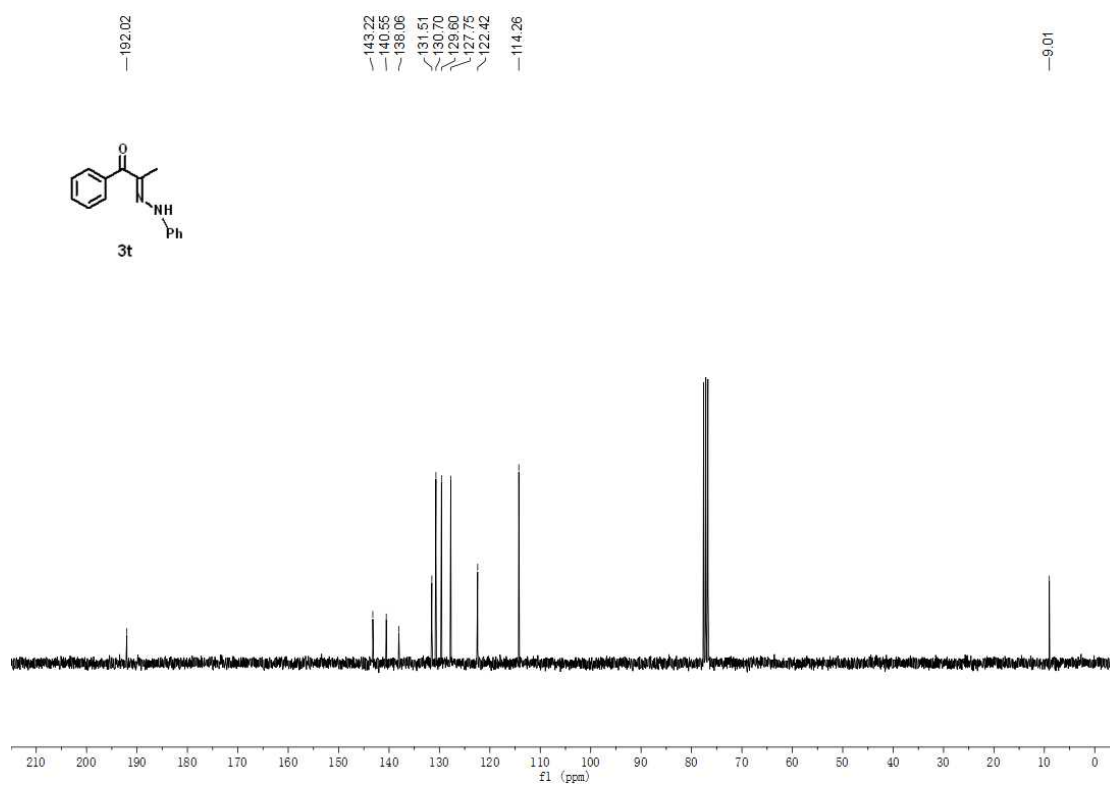

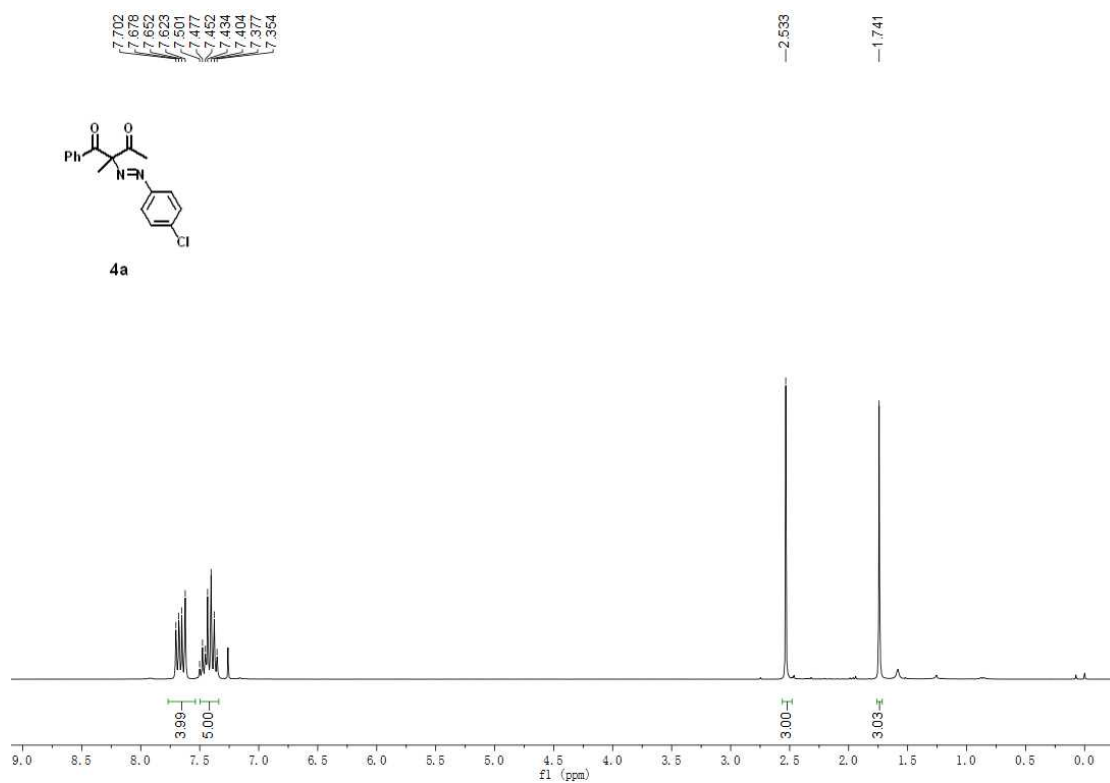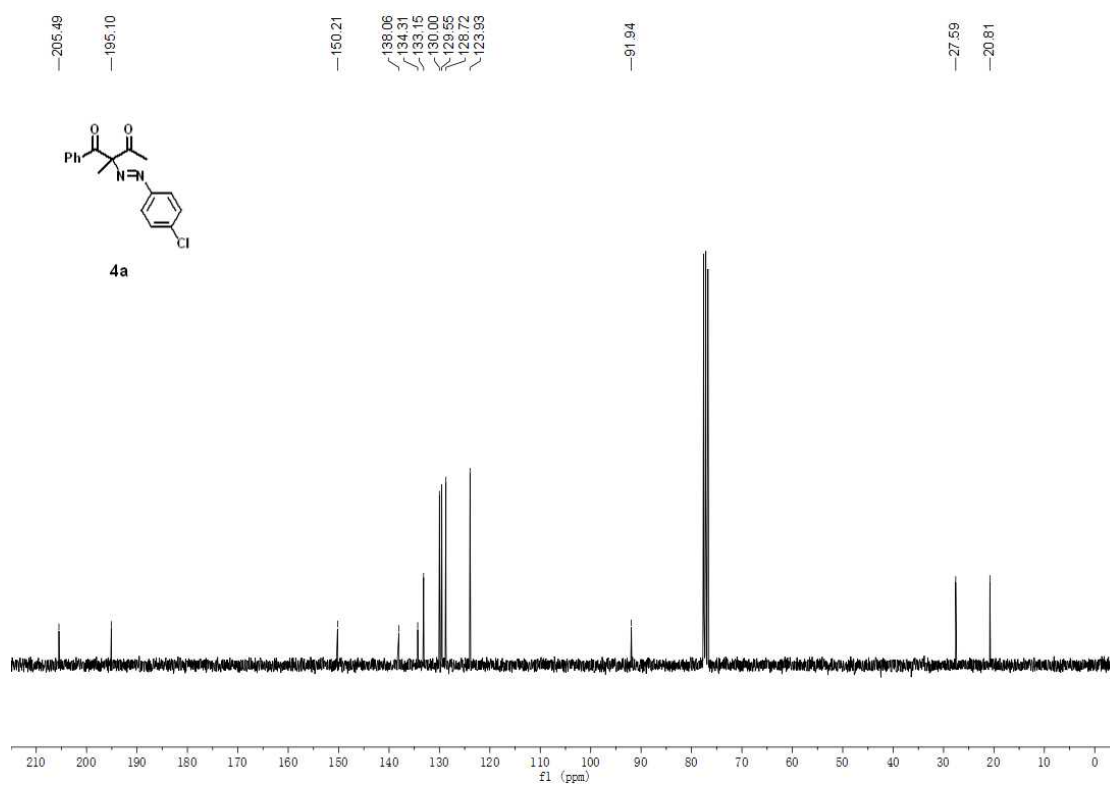





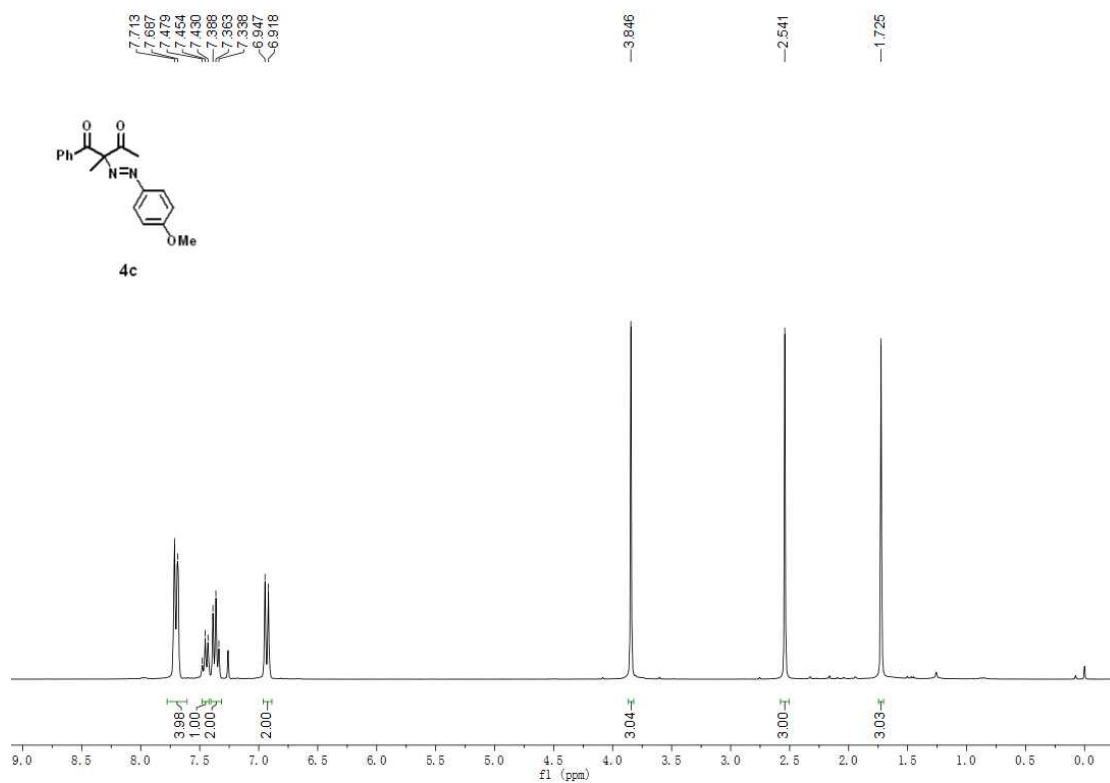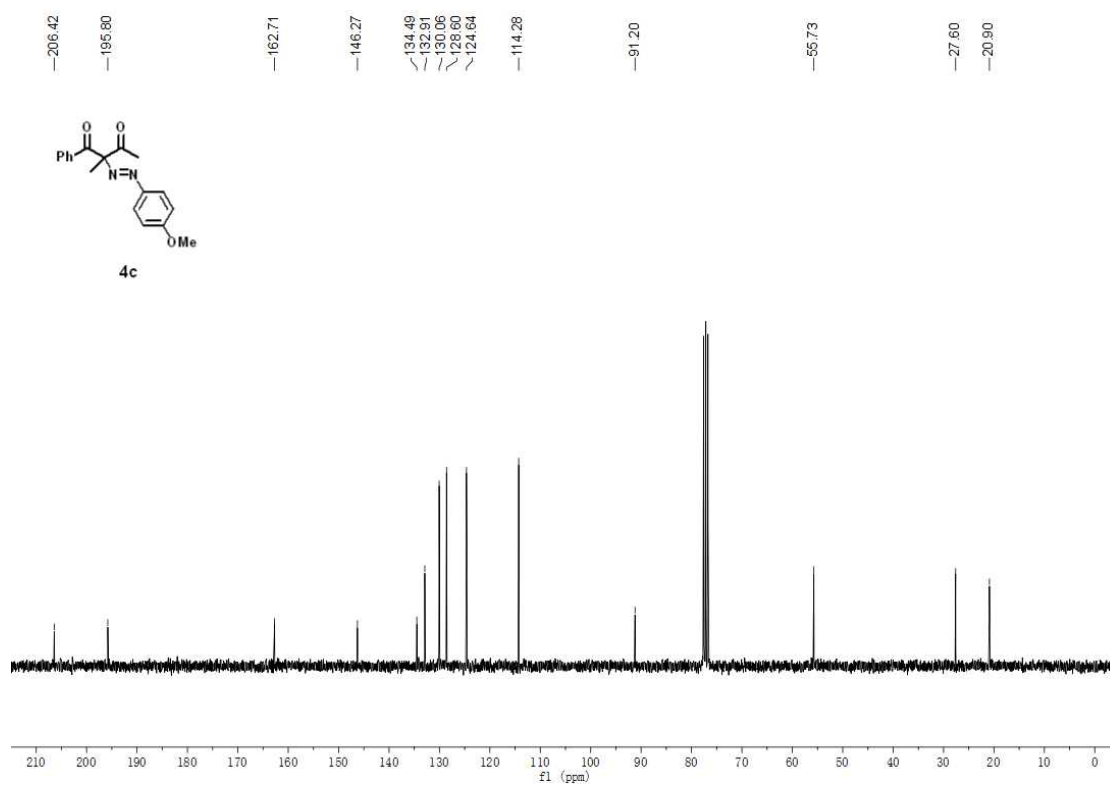

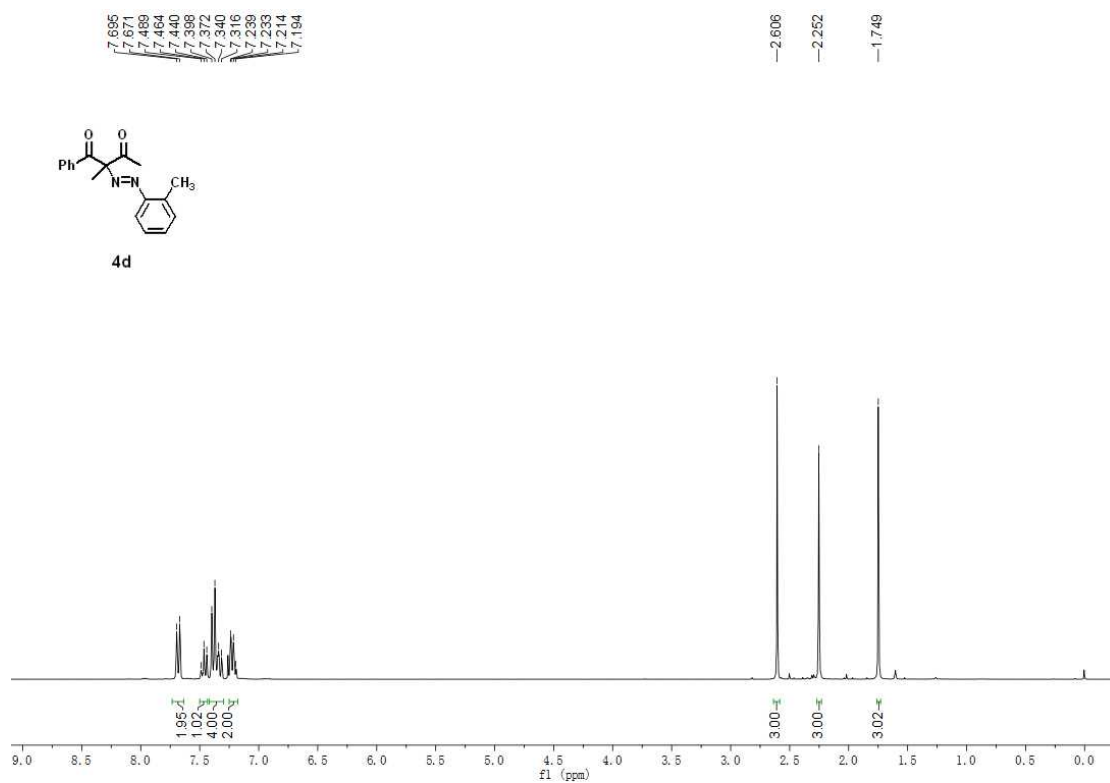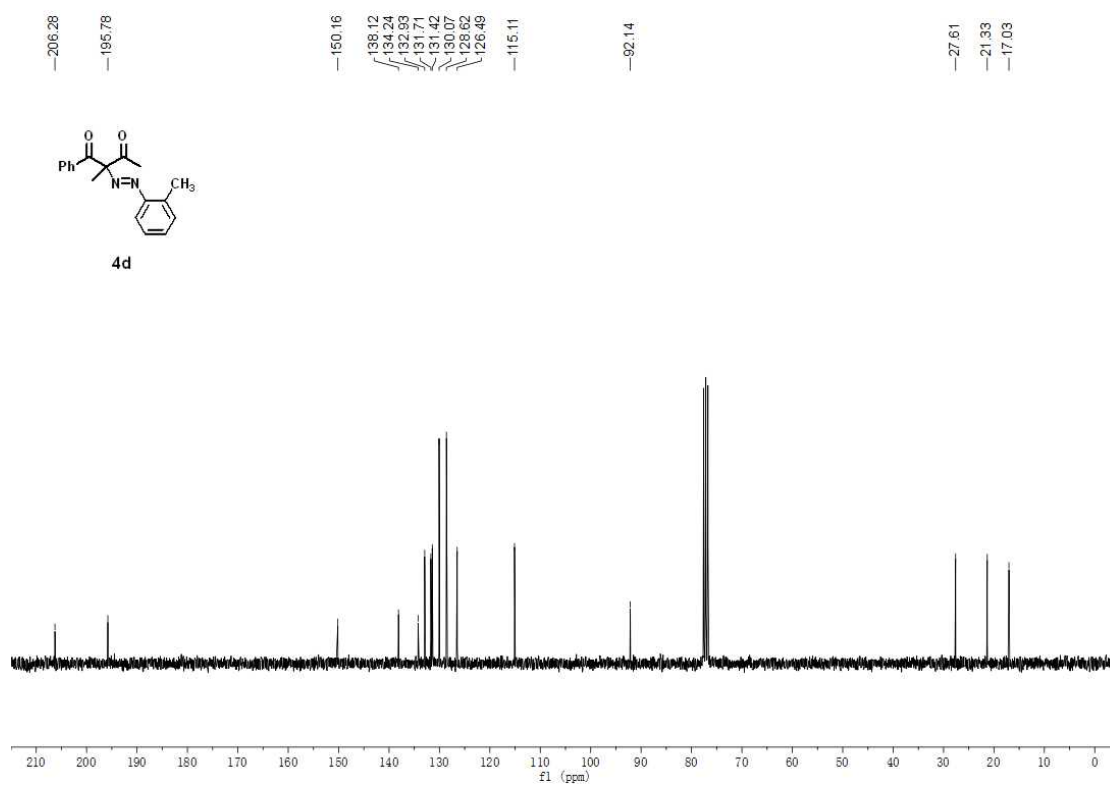

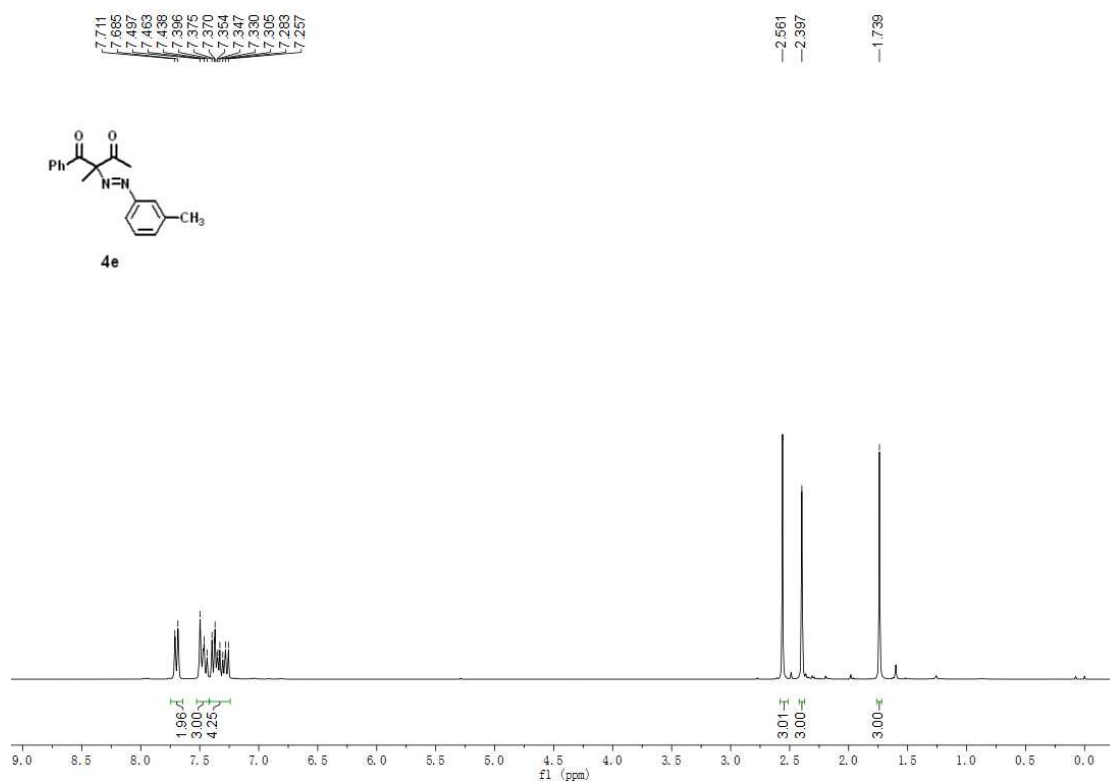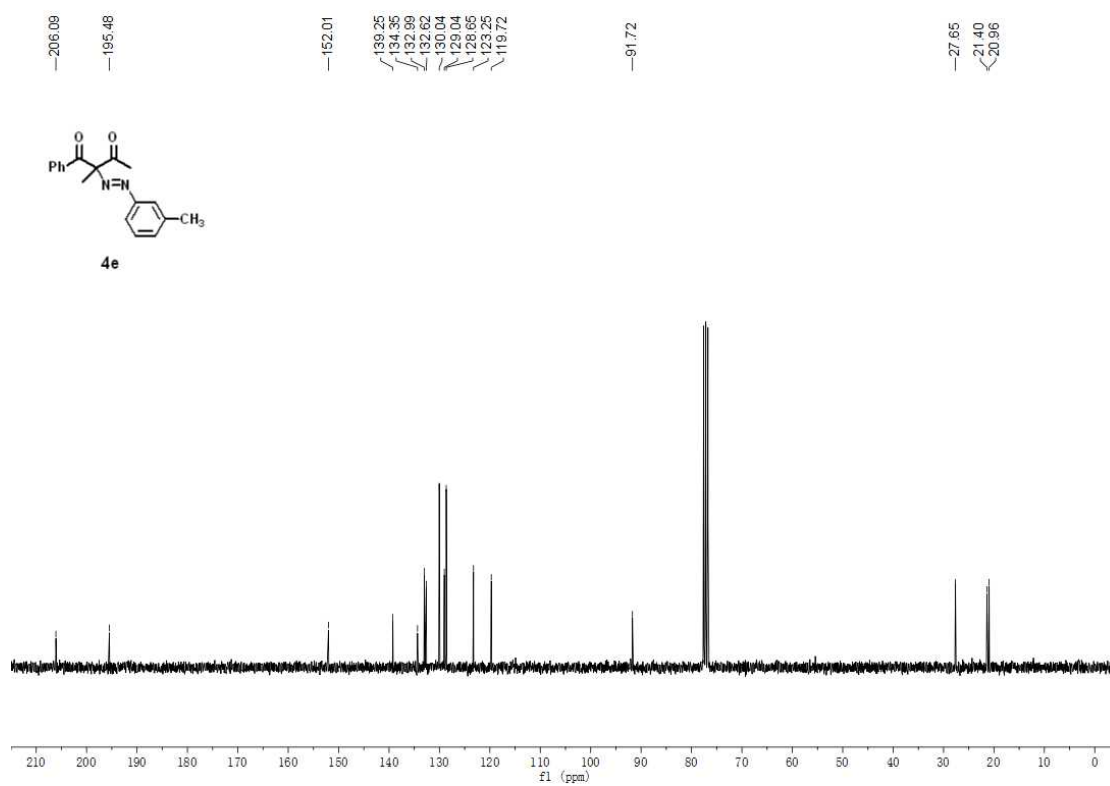

### HPLC spectrum for 3a:

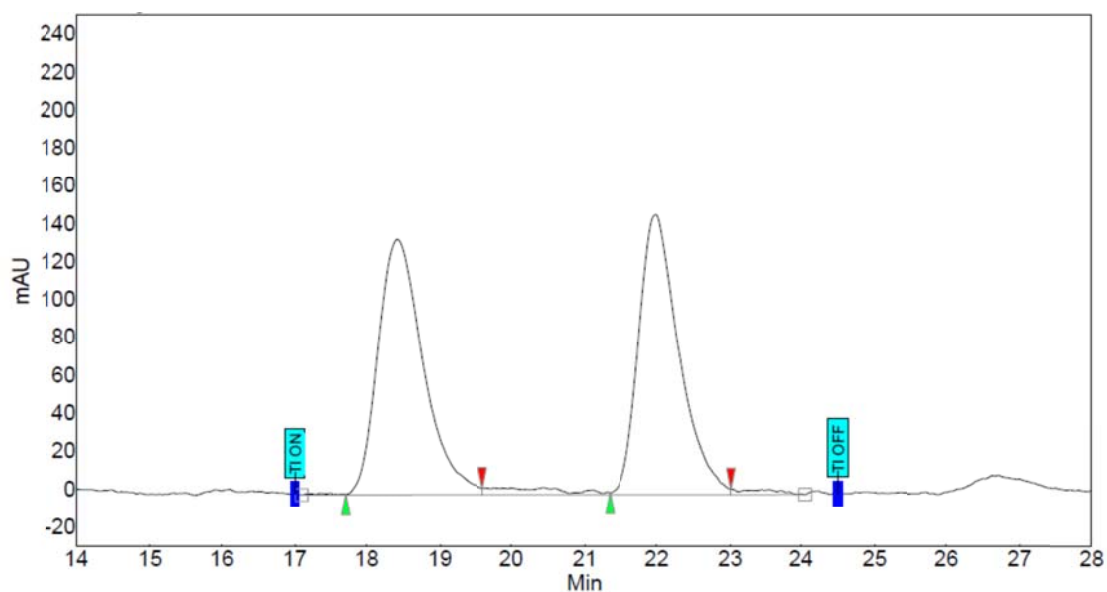

#### Peak results :

| Index | Name    | Time [Min] | Quantity [% Area] | Height [mAU] | Area [mAU.Min] | Area % [%] |
|-------|---------|------------|-------------------|--------------|----------------|------------|
| 1     | UNKNOWN | 18.42      | 50.46             | 134.6        | 95.8           | 50.462     |
| 2     | UNKNOWN | 21.99      | 49.54             | 147.6        | 94.1           | 49.538     |
| Total |         |            | 100.00            | 282.2        | 189.9          | 100.000    |

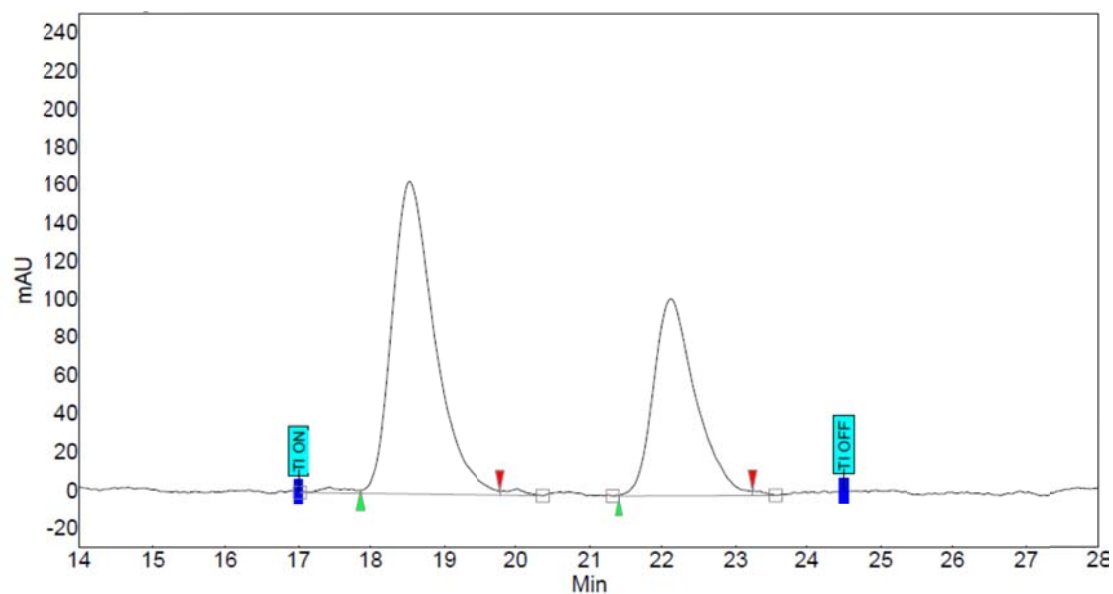

#### Peak results :

| Index | Name    | Time [Min] | Quantity [% Area] | Height [mAU] | Area [mAU.Min] | Area % [%] |
|-------|---------|------------|-------------------|--------------|----------------|------------|
| 1     | UNKNOWN | 18.53      | 61.81             | 163.3        | 109.2          | 61.813     |
| 2     | UNKNOWN | 22.13      | 38.19             | 103.0        | 67.4           | 38.187     |
| Total |         |            | 100.00            | 266.3        | 176.6          | 100.000    |
